# Supplementary material for: The three-dimensional architecture of Hox cluster silencing
Source: PubMed Central journal article supplement — Nucleic Acids Res. 2010 Jul 25;38(21):7472–84. doi: 10.1093/nar/gkq644 (PMC2995065; doi:10.1093/nar/gkq644), 2010-07-25
Supplement: supp_gkq644_Ferraiuolo_et_al_Sup_Figures_all_Converted.pdf [file supp_gkq644_Ferraiuolo_et_al_Sup_Figures_all_Converted.pdf]

## SUPPLEMENTARY FIGURE LEGENDS

**Figure S1.** Chromatin loops cluster transcriptionally silent 5'end *HoxA* genes in a cell type independent manner. Chromatin contacts between regions surrounding the *HoxA9*, *A10*, *A11*, and *A13* genes were measured using libraries from untreated (undifferentiated) NT2/D1 and PMA treated (differentiated) THP-1 cells. The y-axis indicates normalized interaction frequency. The x-axis shows the genomic position relative to beginning of the cluster. The genomic domain is drawn to scale above the graphs. Solid orange vertical lines identify the position of “fixed” 3C region in each graph. Shaded yellow vertical lines illustrate DNA looping contacts with the fixed region. Each data point is an average of at least 3 PCR reactions and error bars represent standard error of the mean (s.e.m.).

**Figure S2.** Chromatin looping is a conserved feature of the transcriptionally silent *HoxB* cluster. **(A)** Linear schematic representation of the *HoxB* cluster on human chromosome 17. Cluster features are as described in Figure 1A. **(B)** 3C interaction frequency heat map of the silent *HoxB* cluster. Pair-wise interaction frequencies were measured by 3C in undifferentiated NT2/D1 cells. Heat map features are as described in Figure 1B. **(C)** Two-dimensional schematic representation of the silent human *HoxB* cluster *in vivo*. The model is based on heat map results presented in **(B)** and is as described in Figure 1C. Note that the yellow circles simply highlight an area encompassing looping contacts and not the number of interactions.

**Figure S3.** Chromatin looping is a conserved feature of the transcriptionally silent *HoxC* cluster. **(A)** Linear schematic representation of the *HoxC* cluster on human chromosome 12. Cluster features are as described in Figure 1A.

**(B)** 3C interaction frequency heat map of the silent *HoxC* cluster. Pair-wise interaction frequencies were measured by 3C in undifferentiated NT2/D1 cells. Heatmap features are as described in Figure 1B.

**(C)** Two-dimensional schematic representation of the silent human *HoxC* cluster *in vivo*. The model is based on heat map results presented in **(B)** and is as described in Figure 1C. Yellow circles highlight an area containing looping interactions.

**Figure S4.** Chromatin looping is a conserved feature of the transcriptionally silent *HoxD* cluster. **(A)** Linear schematic representation of the *HoxD* cluster on human chromosome 2. Cluster features are as described in Figure 1A.

**(B)** 3C interaction frequency heat map of the silent *HoxD* cluster. Pair-wise interaction frequencies were measured by 3C in undifferentiated NT2/D1 cells. Heatmap features are as described in Figure 1B.

**(C)** Two-dimensional schematic representation of the silent human *HoxD* cluster *in vivo*. The model is based on heat map results presented in **(B)** and is as described in Figure 1C. Yellow circles highlight an area containing looping interactions.

**Figure S5.** *HoxD* chromatin loops are conserved in different 3C libraries. **(A)** Linear schematic representation of the *HoxD* cluster on human chromosome 2. Cluster

features are as described in Figure 1A, except that the predicted HindIII restriction pattern in the *HoxD* region is illustrated below linear diagram.

(B) 3C interaction frequency heat map of the silent *HoxD* cluster. Pair-wise interaction frequencies were measured by 3C in undifferentiated NT2/D1 cells. Heat map features are as described in Figure 1B.

(C) Two-dimensional schematic representation of the silent human *HoxD* cluster *in vivo*. The model is based on heat map results presented in (B) and is as described in Figure 1C. Yellow circles highlight an area containing looping interactions.

**Figure S6.** Three-dimensional modeling of the silent *HoxB* cluster identifies CTCF as a likely candidate mediating chromatin loops.

(A) Example of a 5C3D output model of the transcriptionally silent *HoxB* cluster. Green lines represent genomic DNA, and vertices define boundaries between consecutive restriction fragments. Colored spheres as indicated in the legend below identify the transcription start site of corresponding paralogue group.

(B) Three-dimensional local base density scan of the transcriptionally silent *HoxB* cluster. Local base densities at consecutive ten base pairs was estimated in one hundred possible 5C3D outputs models with Microcosm 1.0 (*y-axis*) and represented graphically along the corresponding genomic region (ENCODE hg18 Chr17:43960763 to 44065377) (*x-axis*). The weight of the trace is proportional to the standard deviation with sharper areas indicating smaller deviations. A linear schematic representation of the *HoxB* cluster is shown to scale at the top of the graph and is as described in Figure

1. Shaded yellow vertical lines identify the position of CTCF binding sites mapped in various cell lines as illustrated in **(C)**.

**(C)** CTCF binds to multiple discrete sites conserved in various cell lines at the 5' end of the *HoxB* cluster. CTCF binding was identified by ChIP-seq and ChIP-chip in different cell lines as described in MATERIALS AND METHODS. Binding sites conserved in most cell lines are numbered and highlighted by yellow vertical lines, which are contiguous with lines in panel **(B)**.

**(D)** Conserved CTCF binding sites in *HoxB* are clustered three-dimensionally. The position CTCF binding sites numbered in **(C)** are illustrated in the example 5C3D output model presented in **(A)**. CTCF binding sites are represented by colored spheres as indicated in the legend below.

**(E)** CTCF binding sites are significantly close to each other in three-dimensional models. Distances between pairs of CTCF binding sites were measured in one hundred possible 5C3D outputs models with Microcosm 2.0. The significance of spatial proximity between pair-wise CTCF binding sites is expressed as p-values summarized in a heatmap. Numbers at the top and on the left of heatmap identify CTCF binding sites. Intersecting column and row number identifies the CTCF pair corresponding to p-value. p-values are color-coded based on the scale presented on the *right*, with white indicating low significance and red highly significant proximity. p-values represent the fraction of fragment pairs separated by the same linear genomic distance, which are closer or at the same distance to CTCF pairs in 5C3D output models (see MATERIALS AND METHODS for details).

**Figure S7.** Three-dimensional modeling of the silent *HoxC* cluster identifies CTCF as a likely candidate mediating chromatin loops.

**(A)** Example of a 5C3D output model of the transcriptionally silent *HoxC* cluster. Green lines represent genomic DNA, and vertices define boundaries between consecutive restriction fragments. Colored spheres as indicated in the legend below identify the transcription start site of corresponding paralogue group.

**(B)** Three-dimensional local base density scan of the transcriptionally silent *HoxC* cluster. Local base densities at consecutive ten base pairs was estimated in one hundred possible 5C3D outputs models with Microcosm 1.0 (*y-axis*) and represented graphically along the corresponding genomic region (ENCODE hg18 Chr12:52593459 to 52739739) (*x-axis*). The weight of the trace is proportional to the standard deviation with sharper areas indicating smaller deviations. A linear schematic representation of the *HoxC* cluster is shown to scale at the top of the graph and is as described in Figure 1. Shaded yellow vertical lines identify the position of CTCF binding sites mapped in various cell lines as illustrated in **(C)**.

**(C)** CTCF binds to multiple discrete sites conserved in various cell lines at the 5' end of the *HoxC* cluster. CTCF binding was identified by ChIP-seq and ChIP-chip in different cell lines as described in MATERIALS AND METHODS. Binding sites conserved in most cell lines are numbered and highlighted by yellow vertical lines, which are contiguous with lines in panel **(B)**.

**(D)** Conserved CTCF binding sites in *HoxC* are clustered three-dimensionally. The position CTCF binding sites numbered in **(C)** are illustrated in the example 5C3D output

model presented in **(A)**. CTCF binding sites are represented by colored spheres as indicated in the legend below.

**(E)** CTCF binding sites are significantly close to each other in three-dimensional models. Distances between pairs of CTCF binding sites were measured in one hundred possible 5C3D outputs models with Microcosm 2.0. The significance of spatial proximity between pair-wise CTCF binding sites is expressed as p-values summarized in a heatmap. Numbers at the top and on the left of heatmap identify CTCF binding sites. Intersecting column and row number identifies the CTCF pair corresponding to p-value. p-values are color-coded based on the scale presented on the *right*, with white indicating low significance and red highly significant proximity. p-values represent the fraction of fragment pairs separated by the same linear genomic distance, which are closer or at the same distance to CTCF pairs in 5C3D output models (see MATERIALS AND METHODS for details).

**Figure S8.** Three-dimensional modeling of the silent *HoxD* cluster identifies CTCF as a likely candidate mediating chromatin loops.

**(A)** Example of a 5C3D output model of the transcriptionally silent *HoxD* cluster. Green lines represent genomic DNA, and vertices define boundaries between consecutive restriction fragments. Colored spheres as indicated in the legend below identify the transcription start site of corresponding paralogue group.

**(B)** Three-dimensional local base density scan of the transcriptionally silent *HoxD* cluster. Local base densities at consecutive ten base pairs was estimated in one hundred possible 5C3D outputs models with Microcosm 1.0 (*y-axis*) and represented

graphically along the corresponding genomic region (ENCODE hg18 Chr2:176658690 to 176766146) (*x-axis*). The weight of the trace is proportional to the standard deviation with sharper areas indicating smaller deviations. A linear schematic representation of the *HoxD* cluster is shown to scale at the top of the graph and is as described in Figure 1. Shaded yellow vertical lines identify the position of CTCF binding sites mapped in various cell lines as illustrated in (C).

(C) CTCF binds to multiple discrete sites conserved in various cell lines at the 5' end of the *HoxD* cluster. CTCF binding was identified by ChIP-seq and ChIP-chip in different cell lines as described in MATERIALS AND METHODS. Binding sites conserved in most cell lines are numbered and highlighted by yellow vertical lines, which are contiguous with lines in panel (B).

(D) Conserved CTCF binding sites in *HoxD* are clustered three-dimensionally. The position CTCF binding sites numbered in (C) are illustrated in the example 5C3D output model presented in (A). CTCF binding sites are represented by colored spheres as indicated in the legend below.

(E) CTCF binding sites are significantly close to each other in three-dimensional models. Distances between pairs of CTCF binding sites were measured in one hundred possible 5C3D outputs models with Microcosm 2.0. The significance of spatial proximity between pair-wise CTCF binding sites is expressed as p-values summarized in a heatmap. Numbers at the top and on the left of heatmap identify CTCF binding sites. Intersecting column and row number identifies the CTCF pair corresponding to p-value. p-values are color-coded based on the scale presented on the *right*, with white indicating low significance and red highly significant proximity. p-values represent the

fraction of fragment pairs separated by the same linear genomic distance, which are closer or at the same distance to CTCF pairs in 5C3D output models (see MATERIALS AND METHODS for details).



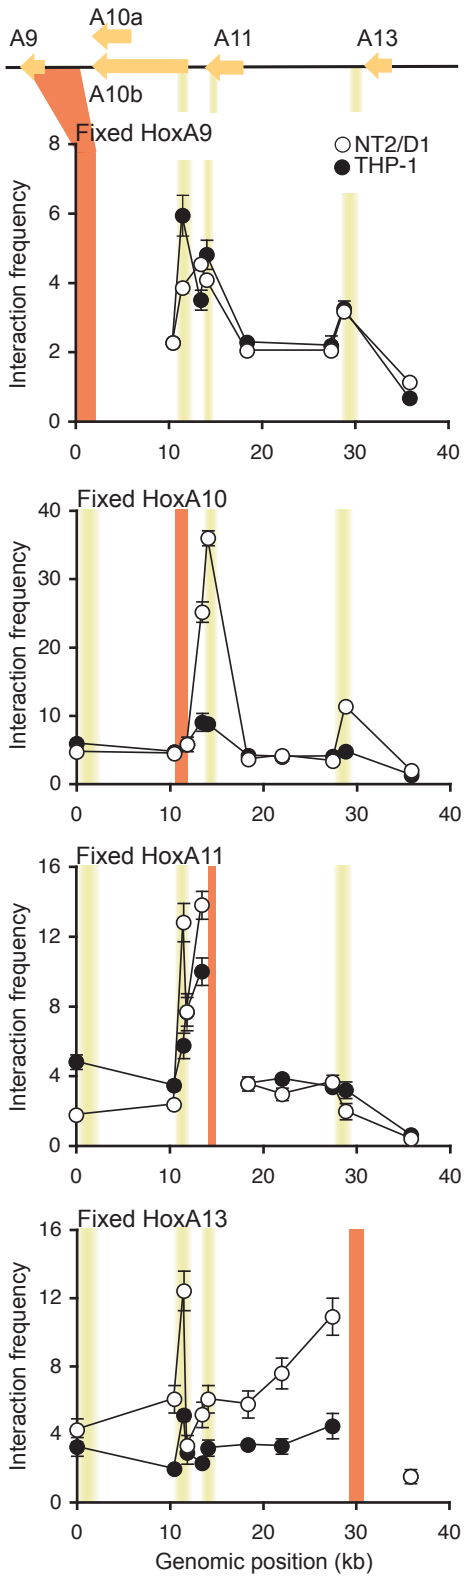

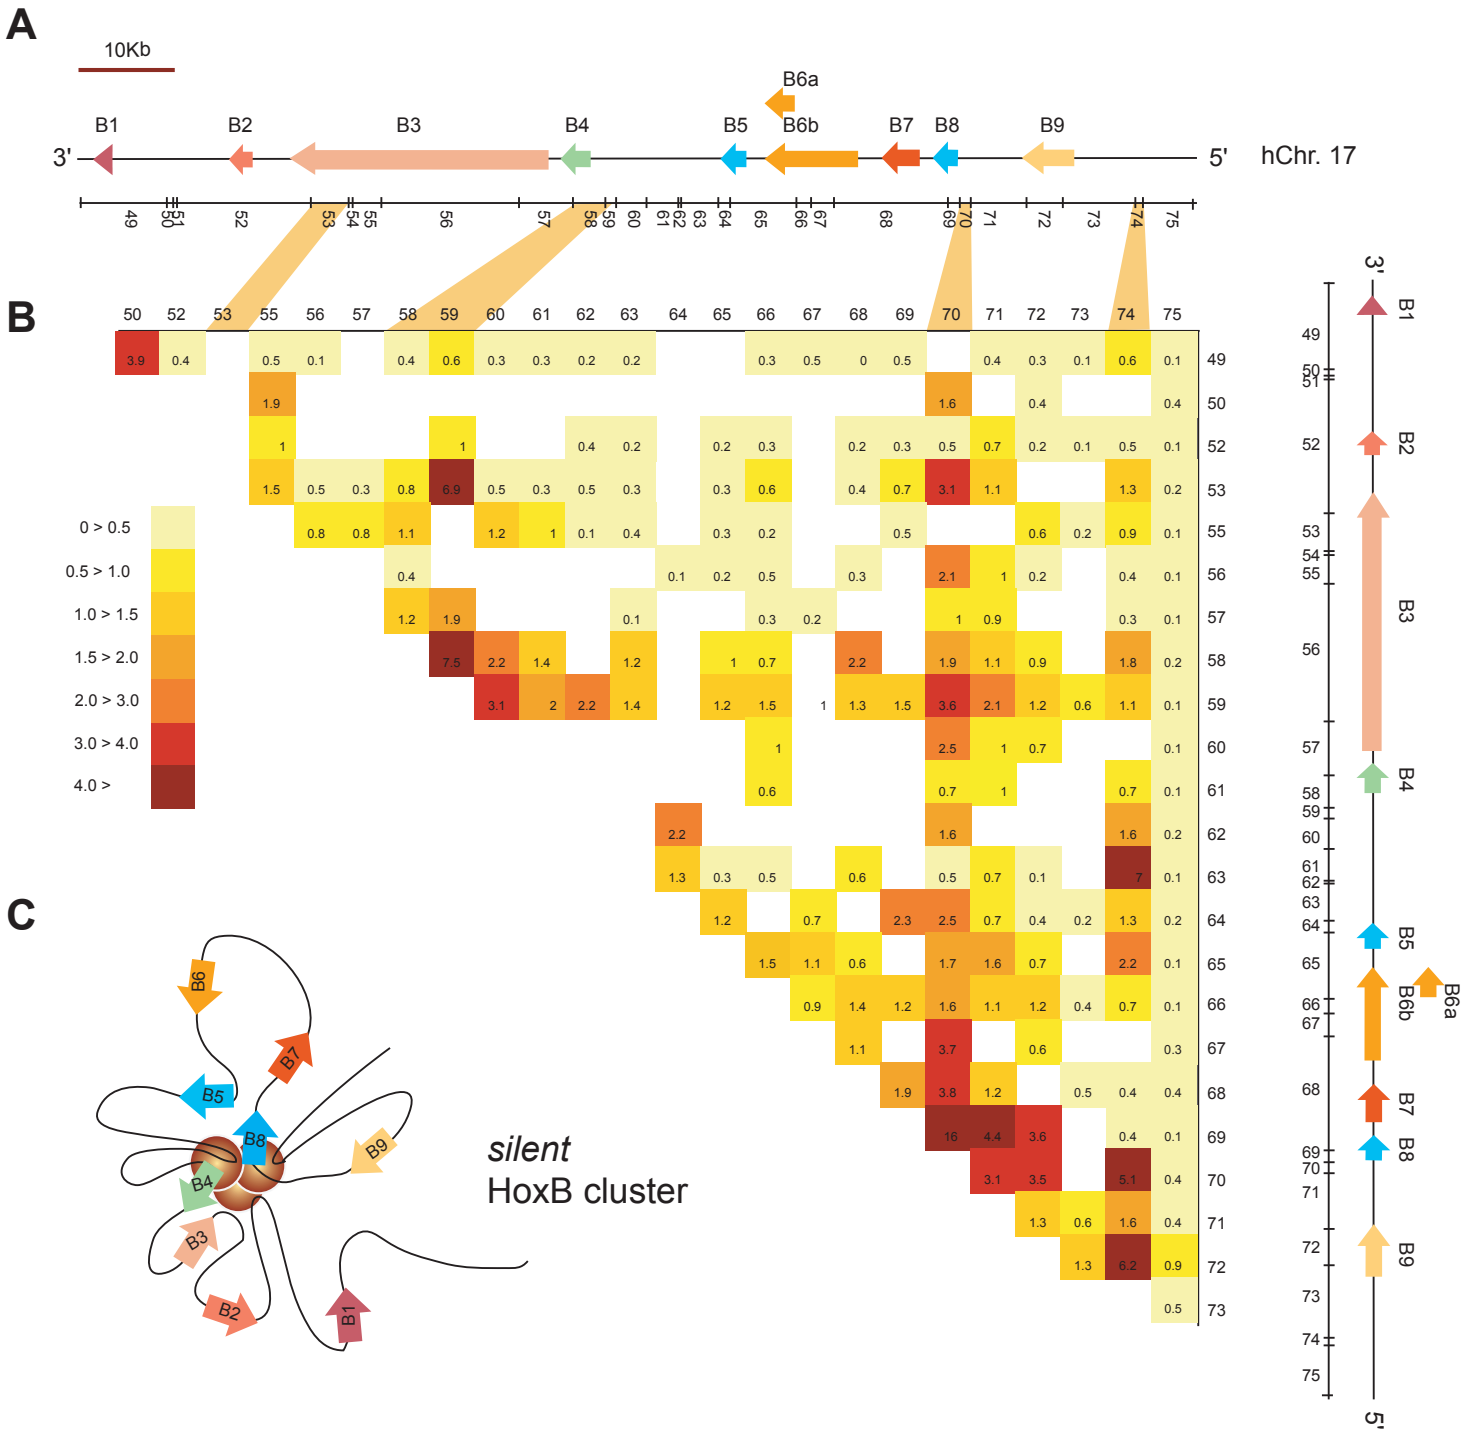

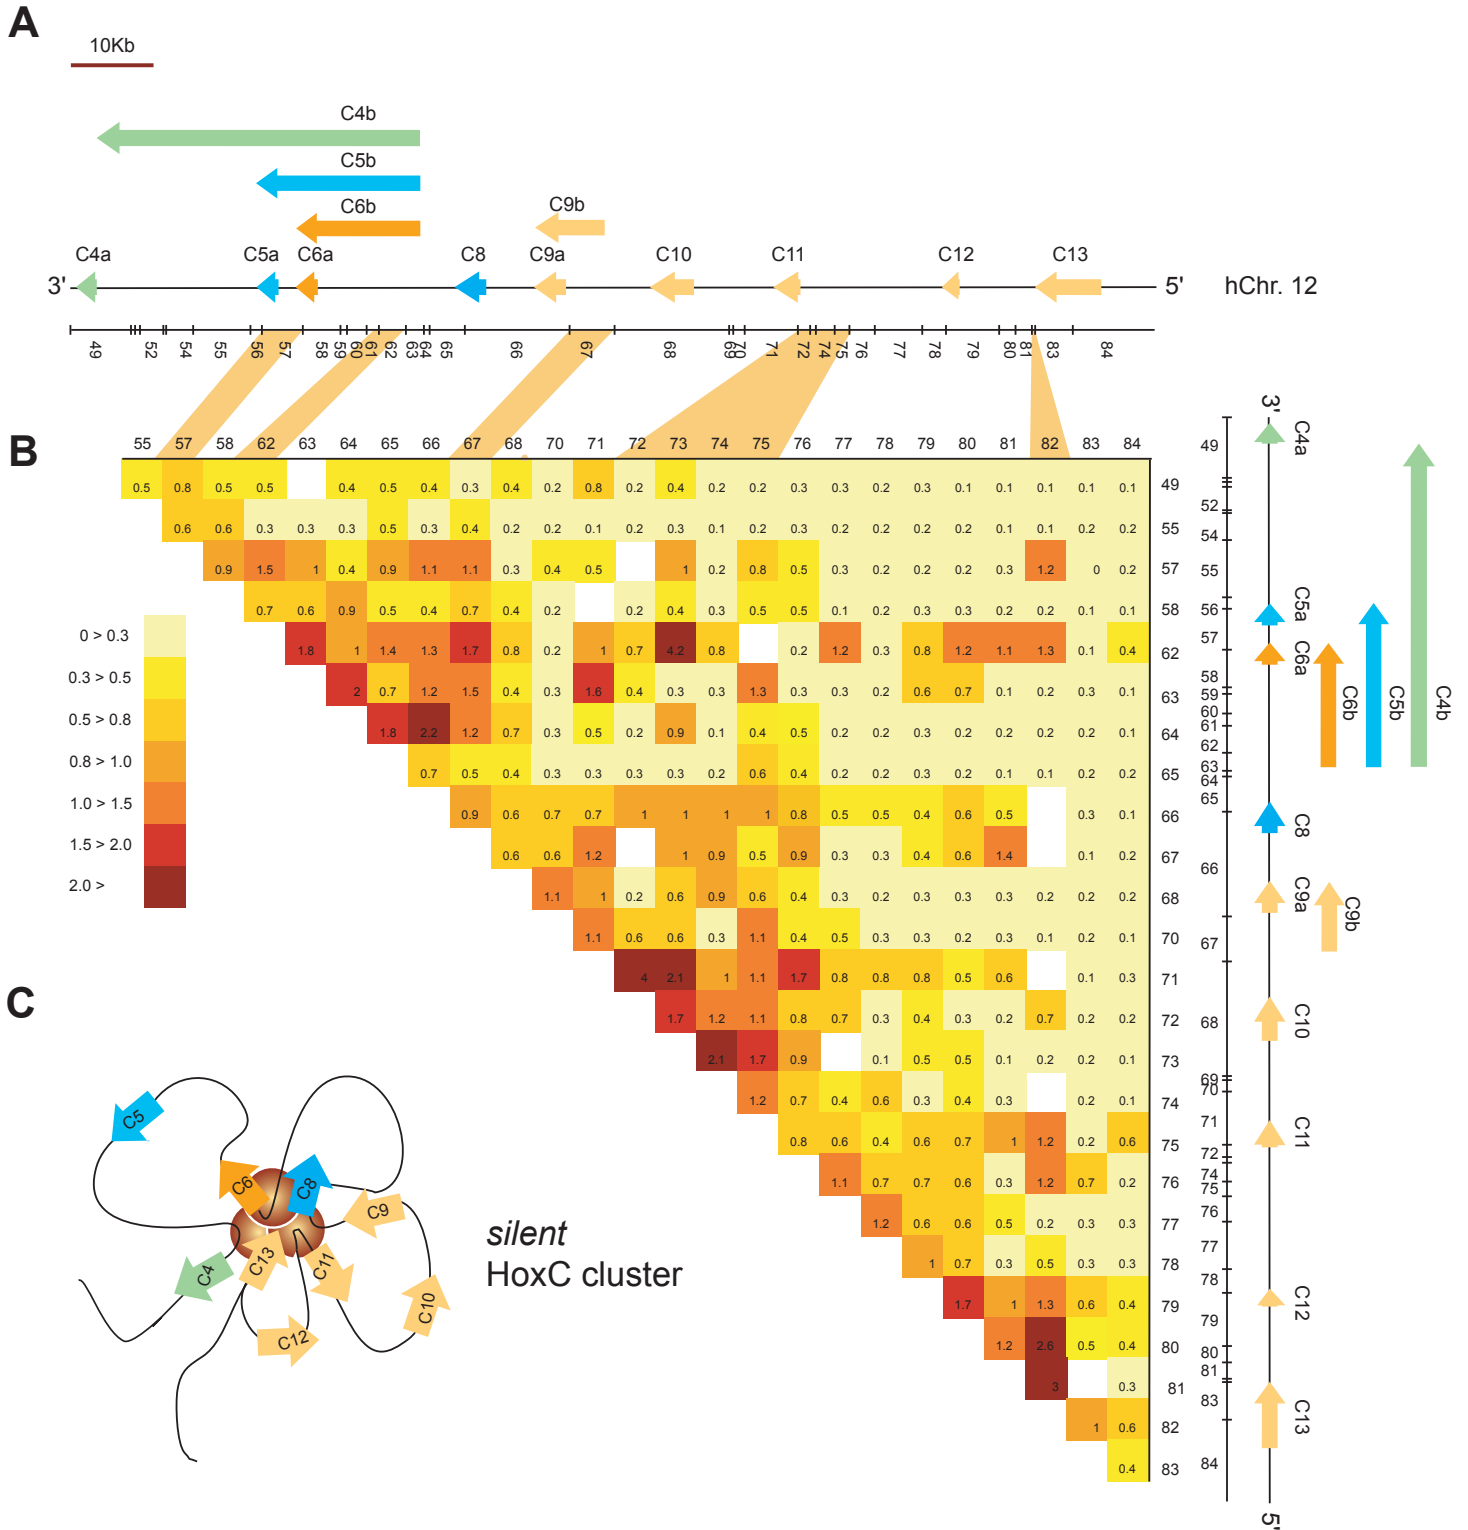

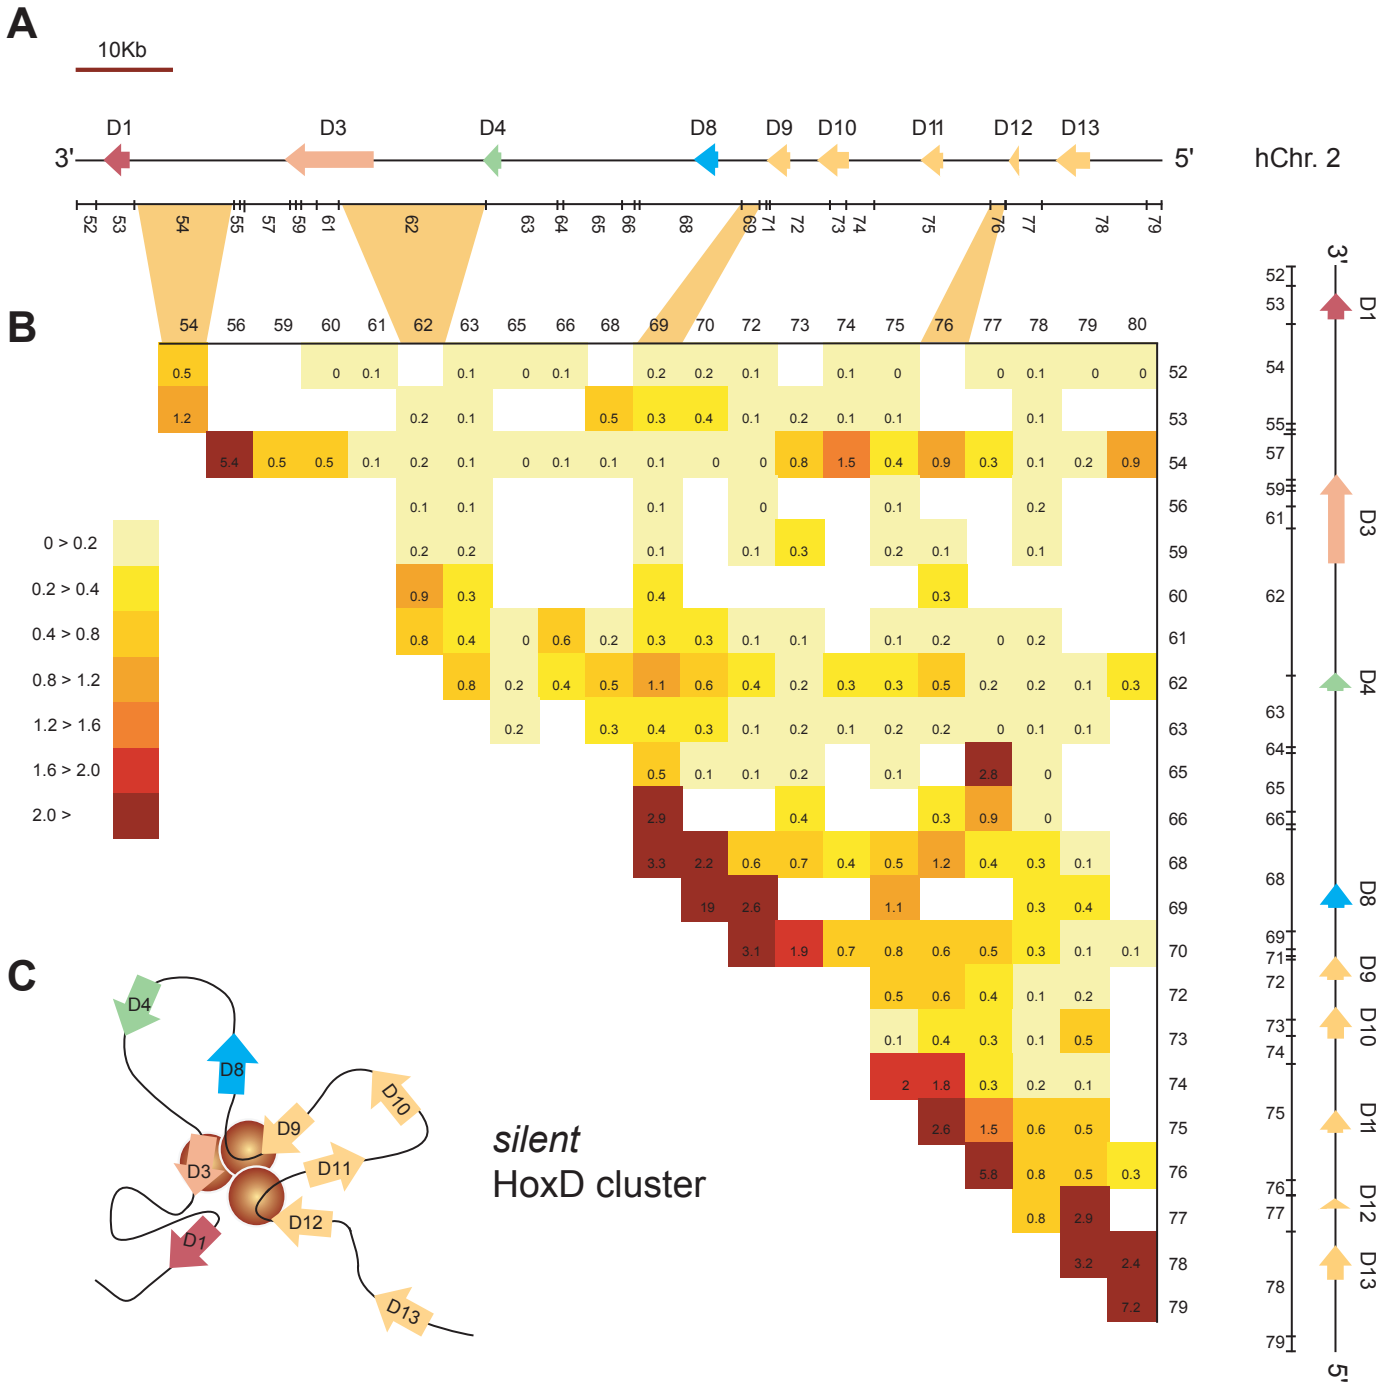

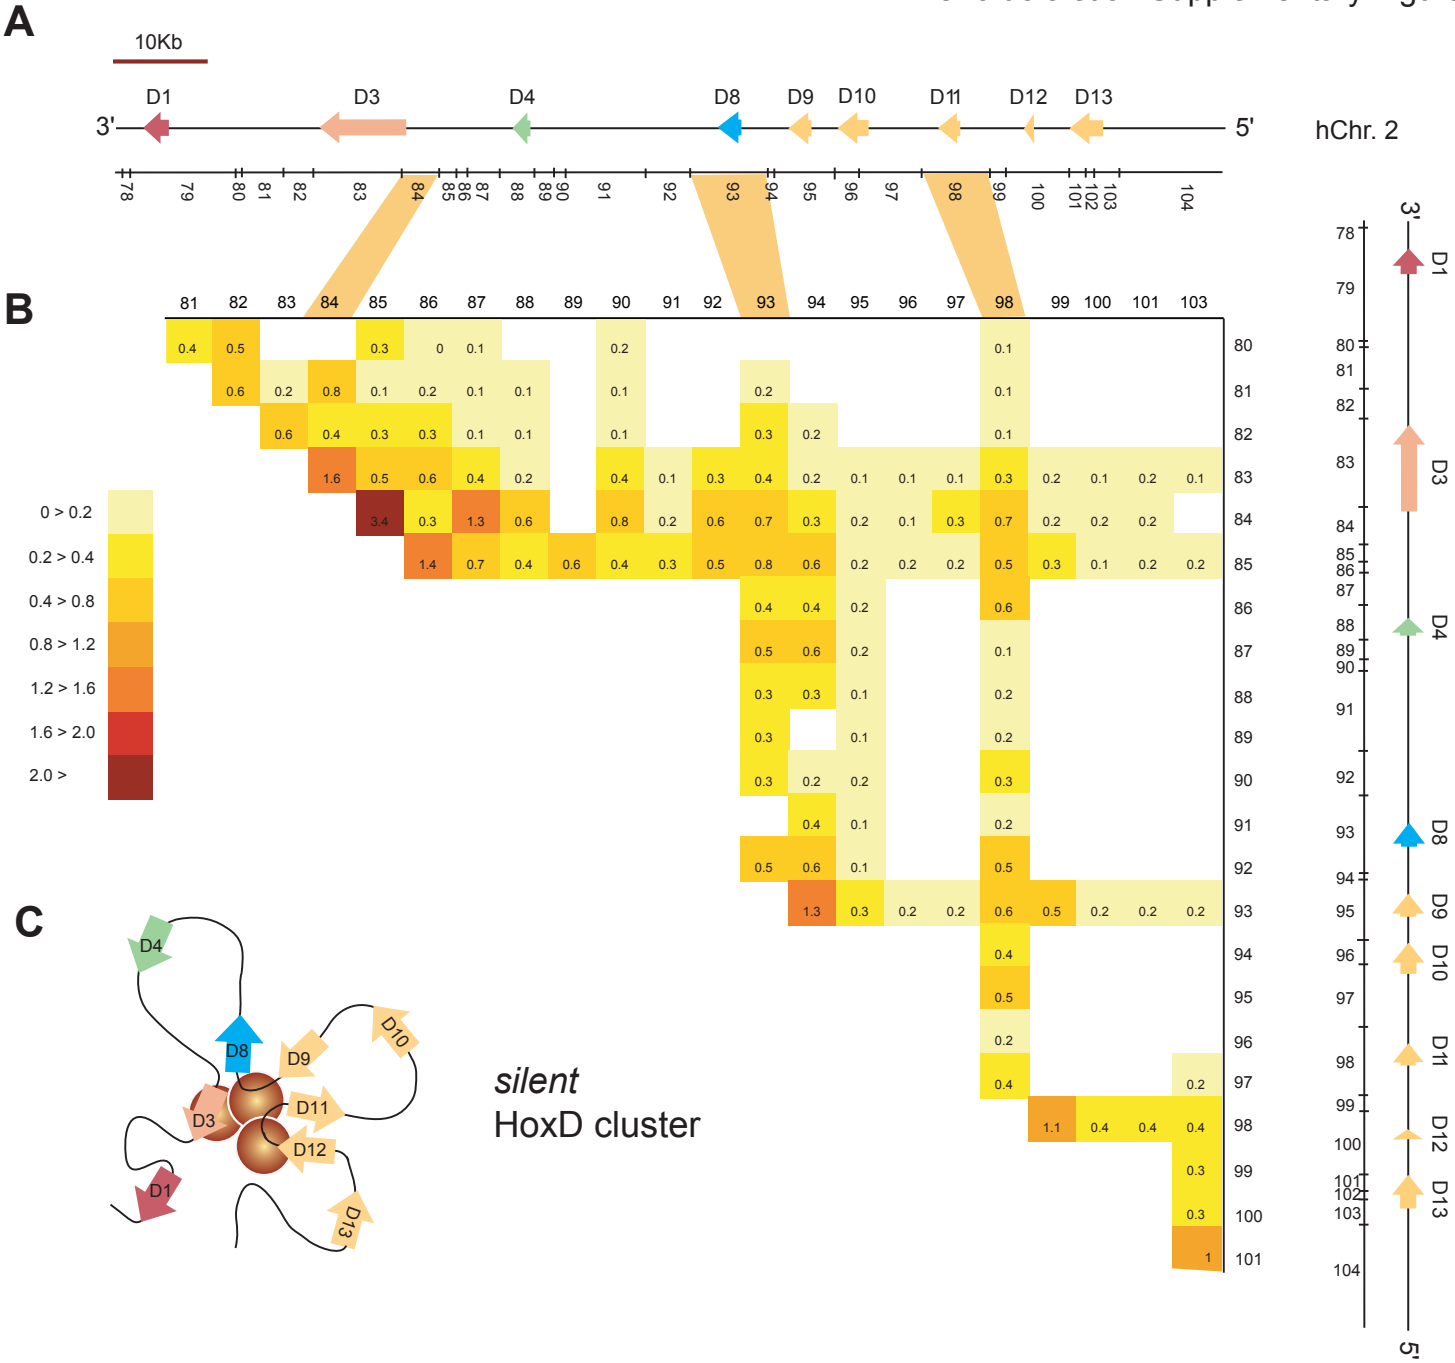

**A**

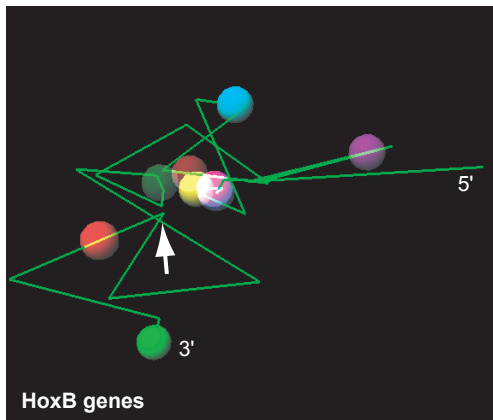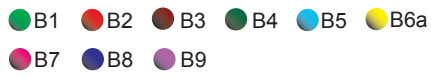

**B**

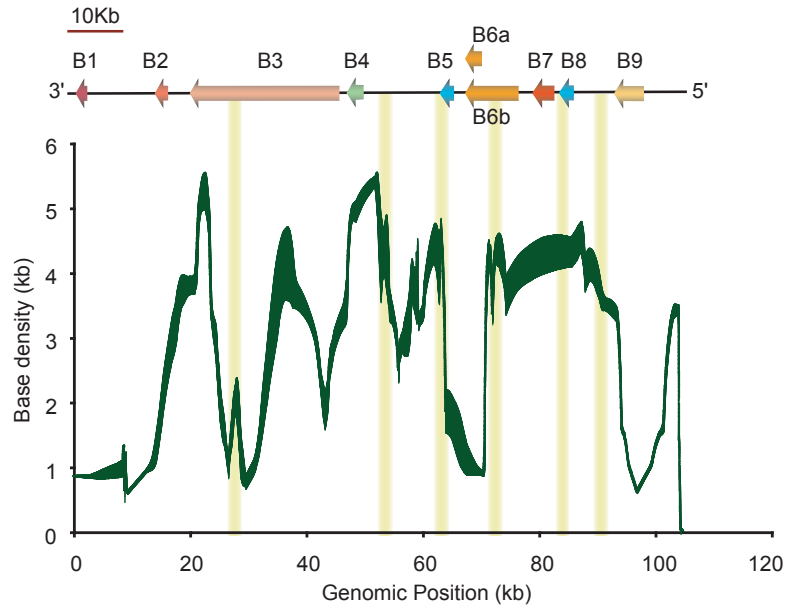

**D**

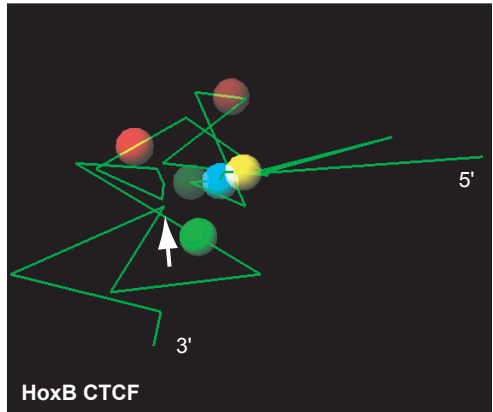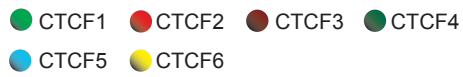

**C**

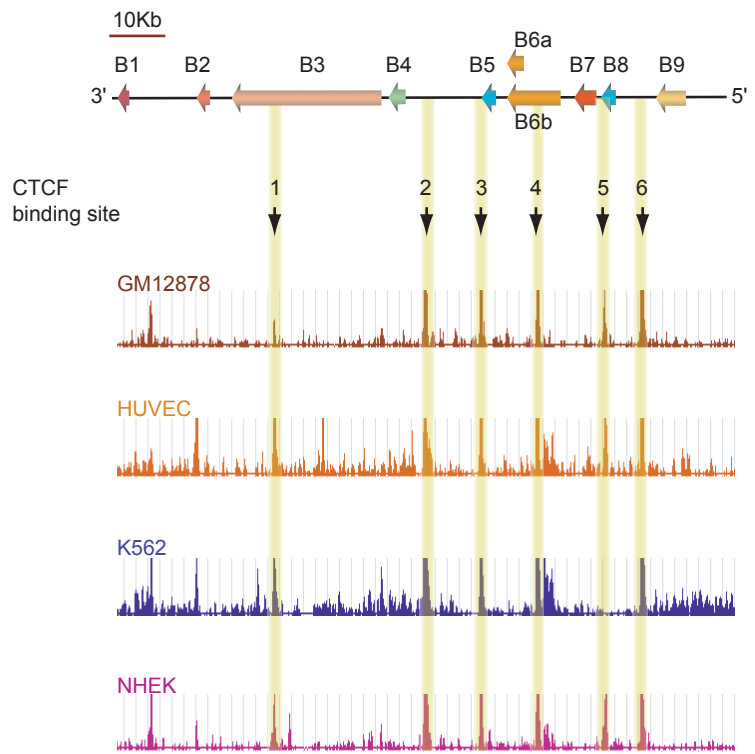

**E**

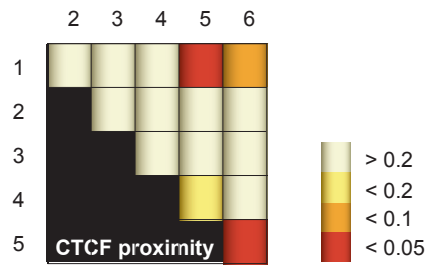

**A**

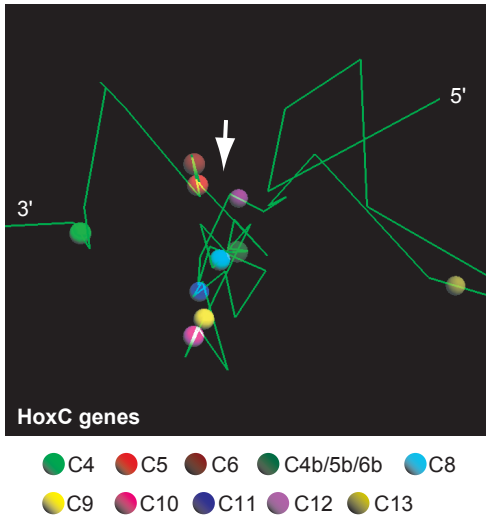

**D**

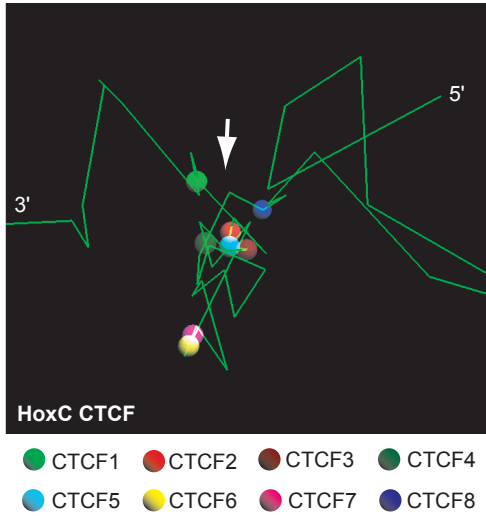

**E**

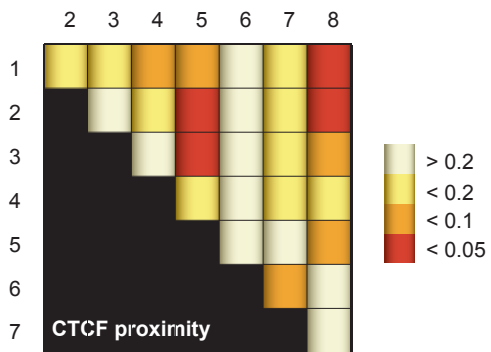

**B**

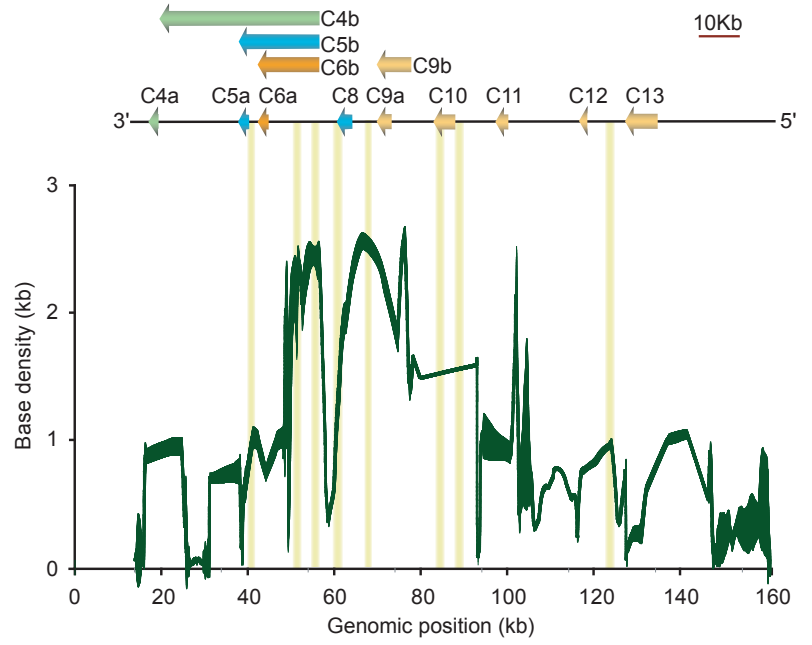

**C**

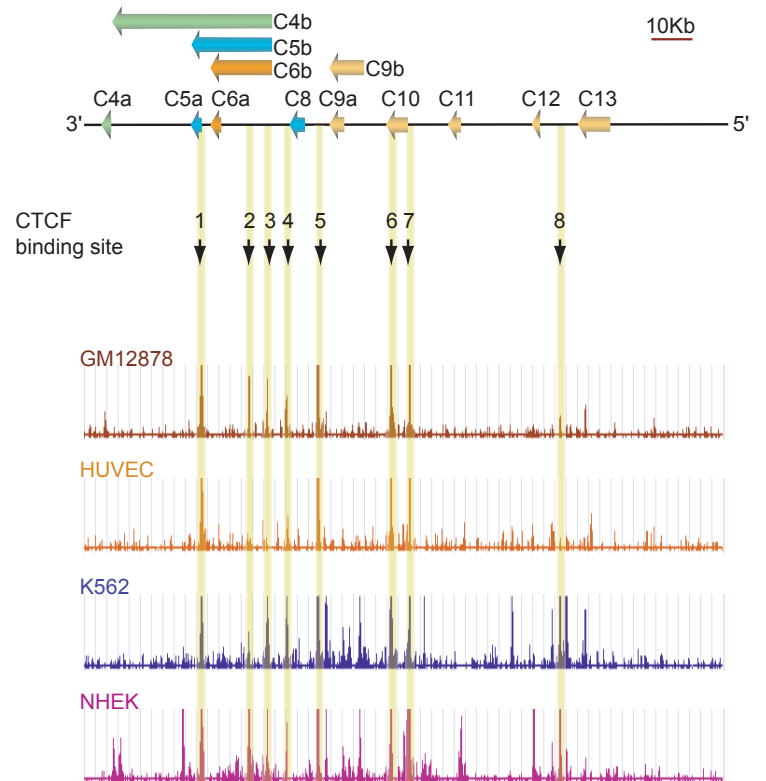

**A**

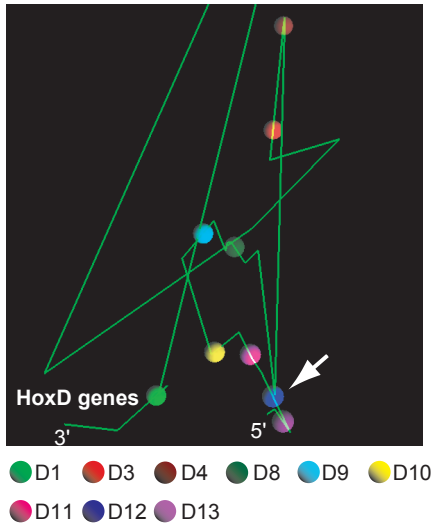

**D**

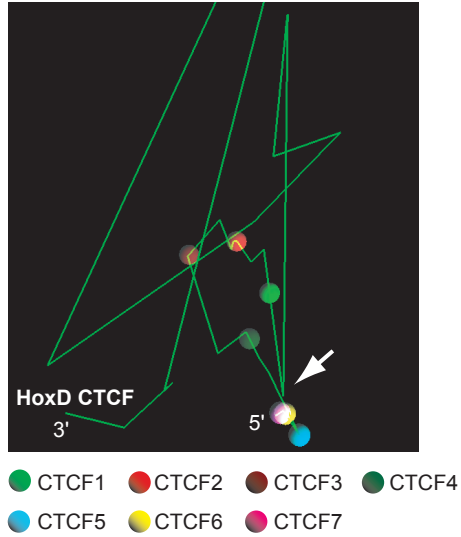

**E**

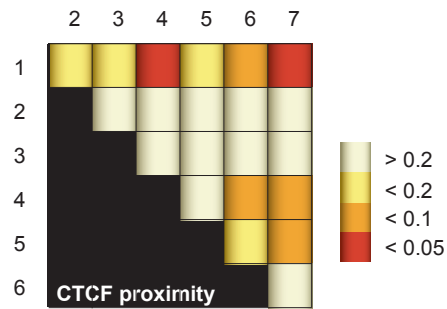

**B**

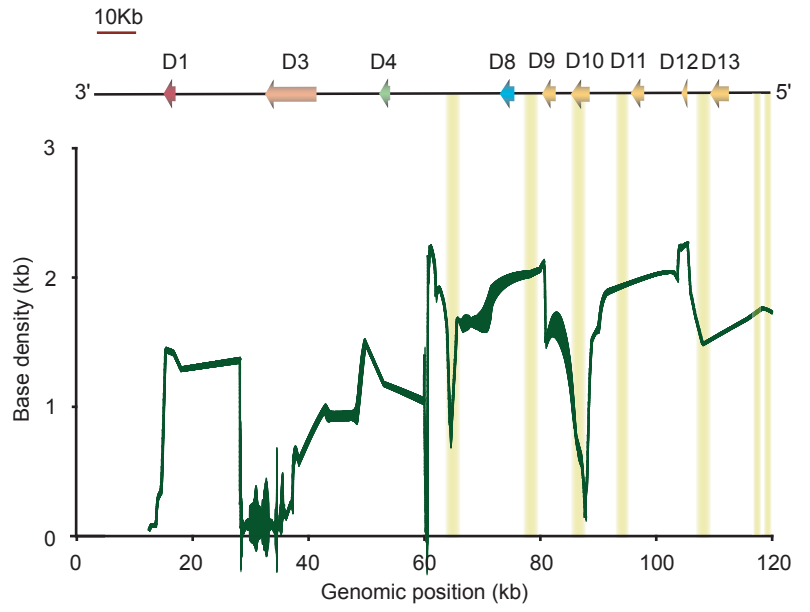

**C**

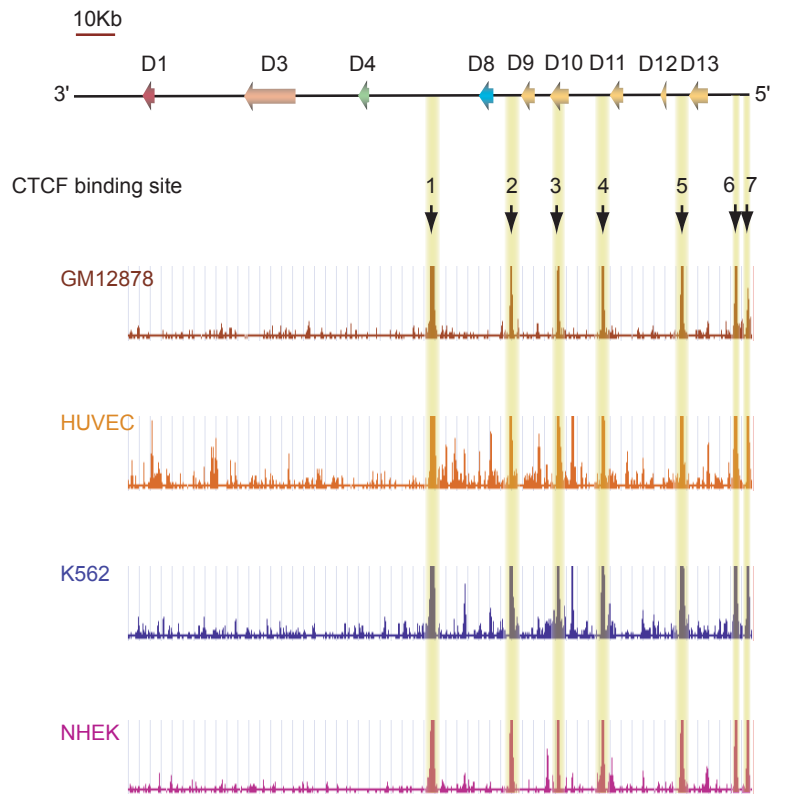



# Supplementary Table 1 Human 3C primer sequences for HoxA, HoxB, and HoxC analysis in BgIII 3C libraries

| Primer Name                      | Primer Sequence (5'-3')             | BgIII fragment position <sup>a</sup> |          | Primer Name                                          | Primer Sequence (5'-3')             | BgIII fragment position <sup>a</sup> |          |
|----------------------------------|-------------------------------------|--------------------------------------|----------|------------------------------------------------------|-------------------------------------|--------------------------------------|----------|
|                                  |                                     | start                                | end      |                                                      |                                     | start                                | end      |
| <b>1. HoxA cluster (Chr. 7)</b>  |                                     |                                      |          |                                                      |                                     |                                      |          |
| HoxA BglF47                      | CAAAGTACCCAACTGCTCTACCACTGG         | 27079118                             | 27085686 | HoxB BglF87                                          | CTGGCAGCATGACCACAGACCATAAAGG        | 44099476                             | 44104697 |
| HoxA BglF48                      | GAGTCATGAACCCACATTAGAATAGCTGAGAGG   | 27085687                             | 27086789 | HoxB BglF88                                          | GAGTGTCAAGGCCATCAAAAGTTAAAAG        | 44104698                             | 44106165 |
| HoxA BglF49                      | CAACAGCACTGACTATGGGTGTTTTAATTGG     | 27086790                             | 27090631 | HoxB BglF94                                          | GATTAGTAGGCTGTGGAGGCAAAATGAAGG      | 44114099                             | 44117257 |
| HoxA BglF50                      | GCTTGGGCAGGGCAATTAATAAGCTTGC        | 27090632                             | 27092571 | HoxB BglF96                                          | CTTGTGAGACTTCCCTTTTTCTGTCATG        | 44119800                             | 44129710 |
| HoxA BglF51                      | CGAAGAGCTGGACTTCTCTGAGGATTCC        | 27092572                             | 27100768 | <b>3. HoxC cluster (Chr. 12)</b>                     |                                     |                                      |          |
| HoxA BglF52                      | GACAGTGTAGAGGGTTCAAAGATAACACC       | 27100769                             | 27110440 | HoxC BglF48                                          | CAAGTAACAACAGCAAGTGGTTCAAAAGG       | 52737153                             | 52739739 |
| HoxA BglF53                      | CGAATGCATAGAGTCTCAAGATGCCACCG       | 27110441                             | 27114681 | HoxC BglF49                                          | GTTAGACAGAGTGACCTGCATTTTACCTCG      | 52729290                             | 52737152 |
| HoxA BglF55                      | CAACCCAGCCCAAAAGTTTGAACCTAG         | 27115729                             | 27119306 | HoxC BglF50                                          | GATGTGTGGATGCAGGAACCTTGTCTGTGC      | 52728908                             | 52729289 |
| HoxA BglF58                      | CATTAATGACTTGGGGTGGGATGGGTGA        | 27121876                             | 27126958 | HoxC BglF52                                          | GAGACAGAATTACTTGTCTTAATAAGCC        | 52725707                             | 52728200 |
| HoxA BglF59                      | CAGAACATTACCAACTGTCTGCCATCCG        | 27126959                             | 27130638 | HoxC BglF54                                          | GAGAACGACAGTCAAAAAGAGAAAAGTTTACC    | 52722453                             | 52725608 |
| HoxA BglF60                      | GGTTTTGTGCTTATTGTAGGGAACCTCCC       | 27130639                             | 27133878 | HoxC BglF55                                          | CTCTAGAGGCCCTTATGAGACCAATGG         | 52715790                             | 52722452 |
| HoxA BglF61                      | CCAGCACAGACTCTTAACCCGATAATGTC       | 27133879                             | 27135357 | HoxC BglF56                                          | GAGGAAAGGCCAAAAGGAAAGGCCGAGG        | 52714476                             | 52715789 |
| HoxA BglF62                      | GTGTGGCTCTGAGTTTGTCTTCCCTG          | 27135358                             | 27135550 | HoxC BglF57                                          | CGCGTTAGGTAGCTGAAAGTCAAAATTC        | 52709745                             | 52714475 |
| HoxA BglF63                      | CATGGCACCAAGTAAGCTTTTGTCACTGG       | 27135551                             | 27141654 | HoxC BglF58                                          | GTTAAGTGTTTTATGACGTCCTTAACAGAGGG    | 52705529                             | 52709744 |
| HoxA BglF64                      | CTAAACGAGATTGAAGGGGGACTTTTTGTGTG    | 27141655                             | 27147801 | HoxC BglF59                                          | GACTGGACCCAGCCTGAAGAAGTTCGTGG       | 52704593                             | 52705528 |
| HoxABglF64b                      | GAGTGCAACACACAACATTGGCACTAAACG      |                                      |          | HoxC BglF60                                          | GTTATACATGGCAGGAGTTTTGTGTGGG        | 52702611                             | 52704592 |
| HoxA BglF64REV                   | CCTTTATTTGAAAAGAGGGATTCTGATTGGC     |                                      |          | HoxC BglF61                                          | GAAAGGAGGCCCATCAATTCTCAGCCCTGG      | 52701334                             | 52702610 |
| HoxA BglF65                      | GCGTGGATTAGAAAAGGCTGGCTTTACC        | 27147802                             | 27149225 | HoxC BglF62                                          | CAATGGGCACAGCCCTCAAGTCTCTCTC        | 52697799                             | 52701333 |
| HoxA BglF66                      | CGCTGGGCTCGTGGAAATGATGAGCTTG        | 27149226                             | 27151902 | HoxC BglF63                                          | GAGGTGAGAATTTGGGGTCAACTTCTAGGACC    | 52696062                             | 52697798 |
| HoxA BglF67                      | GTTTGTGGGCTTGTAAAACCCCTTGAATTAGC    | 27151903                             | 27155489 | HoxC BglF64                                          | CTTTCCAGCCAGCCAGGCAAGTCTTAGG        | 52695263                             | 52696061 |
| HoxA BglF68                      | GAAACATCAGGGCGTACATATTTAACACAGC     | 27155490                             | 27160284 | HoxC BglF65                                          | GCTACCATAAACGAAACTTCAAGGGAGTTGC     | 52691287                             | 52695262 |
| HoxA BglF69                      | CGAGTCGGACCTTCTGCTTCACTCTTTC        | 27160285                             | 27161219 | HoxC BglF66                                          | GGGGTAGAACCTCAGGATCTCATACACC        | 52679296                             | 52691286 |
| HoxA BglF70                      | CCCAAATGGCATCACTGCTTTTGTCTGG        | 27161220                             | 27169811 | HoxC BglF67                                          | CTGCCGCCCTCTTTCACCTGGTCTC           | 52674120                             | 52679297 |
| HoxA BglF71                      | CAGTCAAGCTTTGCCCTAGCCAGTCTCC        | 27169812                             | 27174699 | HoxC BglF68                                          | CTTGACACAGATGCTACGGAGTTCCAGC        | 52661098                             | 52674119 |
| HoxA BglF72                      | GATGACAACCCCAATGGAGTGATTGCTCCG      | 27174700                             | 27185151 | HoxC BglF69                                          | GCTTCTAAGTTGCCCCAGTAAAGTCAAGC       | 52660795                             | 52661097 |
| HoxA BglF73                      | GCTTTGACATTGATCGGAAGTGCAGCCATC      | 27185152                             | 27186177 | HoxC BglF70                                          | GGGAAGGCTTGTGATGCTGATATTGCTC        | 52659517                             | 52660794 |
| HoxA BglF74                      | GACTCTCTCAGCAACTTGAAGACTTTTGG       | 27186178                             | 27186535 | HoxC BglF71                                          | CATAGCAGGAGGATGATGTTCTCCGATGG       | 52653468                             | 52659516 |
| HoxA BglF75                      | CAGAAGCTTCCAAGCTCAGTTCAAGAGCC       | 27186536                             | 27188136 | HoxC BglF72                                          | GAAGAGACTAACCCAGACAGTGGAAAAGGAGC    | 52651995                             | 52653467 |
| HoxA BglF76                      | CACCAGGGTCCCAAGCTGCTACTCTAG         | 27188137                             | 27188771 | HoxC BglF73                                          | GCTCAGCATTTAAGTACACCTGAGTGG         | 52651310                             | 52651994 |
| HoxA BglF77                      | CTTGAAGGATCTGGAGTGTGCTGAAGG         | 27188772                             | 27193079 | HoxC BglF74                                          | GATGCTAGCAACCCAGCCATTTCTTCC         | 52649156                             | 52651309 |
| HoxA BglF78                      | CAGAGCTCTTCCATTACAGGAATATCTCC       | 27193080                             | 27196708 | HoxC BglF75                                          | CACCGAATCTAGATAGTCCAAAGAGAGC        | 52647540                             | 52649155 |
| HoxA BglF79                      | CAATAGCTCTAATACAGTGTGAGACACCC       | 27196709                             | 27202119 | HoxC BglF76                                          | GAAGTGCAGGGGACAGAAATCCAAATGG        | 52644510                             | 52647539 |
| HoxA BglF80                      | GTGCACAAATACATTTACAGAGTGTGCTGAATGTC | 27202120                             | 27203509 | HoxC BglF77                                          | CTGTTTTCAACCTCTTTAGGCTGTCCAC        | 52639188                             | 52644509 |
| HoxA BglF80-2                    | CCAGCAAATGTTAGCAAATATTGGGAATGCC     |                                      |          | HoxC BglF78                                          | CAAAAACAGACAAGAGGATATCCAGGGAGG      | 52636547                             | 52639187 |
| HoxA BglF81                      | GTTGACGTTTGACATTTAACGGGCTGGGC       | 27203510                             | 27204194 | HoxC BglF79                                          | CAGTGAATCGTCTCCACCCAGCTTAAAGC       | 52630388                             | 52636546 |
| HoxA BglF82                      | GAGCAGATCATTTGGAAAGGAGCAAGTGG       | 27204195                             | 27210535 | HoxC BglF80                                          | CCTTTTTAGGCTTACCAGTGTCCCAATGC       | 52628427                             | 52630387 |
| HoxA BglF87                      | CTTGTGTGGATCCAGGGTGCATTTTCTG        | 27216438                             | 27220562 | HoxC BglF81                                          | CCAGTCTGAACTGGCTGAAGGATTTCCG        | 52626916                             | 52628426 |
| HoxA BglF88                      | CAAGTTAATGCCCATATAGCCCCATAATCC      | 27220563                             | 27230964 | HoxC BglF82                                          | GAACACTGTTTTGTAATGCACCAGTGGG        | 52626325                             | 52626915 |
| HoxA BglF93                      | CGAGTCCAGAGCAGTTCTTAACCTGCTG        | 27236536                             | 27240602 | HoxC BglF83                                          | CAGACTACCAGATGAGGATCTCAGAGC         | 52621925                             | 52626324 |
| HoxA BglF94                      | CTAAGACTGGCCAGTCACTGTTGAAAGAGC      | 27240603                             | 27246456 | HoxC BglF84                                          | GGAGAGTACTCTTTCTCCATGTCCGAAAGG      | 52608656                             | 52621924 |
| HoxA BglF95                      | GAAACAGGAATCATCGCTGGGCTTGG          | 27246457                             | 27267169 | HoxC BglF85                                          | CCAAAAGCCATTTTTCAAGAGGCCGAGC        | 52607711                             | 52608655 |
| <b>2. HoxB cluster (Chr. 17)</b> |                                     |                                      |          |                                                      |                                     |                                      |          |
| HoxB BglF49                      | CTTGGAAACTGTCCATCTAGAGGTGACC        | 43960763                             | 43969183 | HoxC BglF86                                          | GAATTGTAGAGATAAGCCAATAGATCAGGGC     | 52605458                             | 52607710 |
| HoxB BglF50                      | GGAGAGAGAGAAAAGTTTTAGAGGGCTCC       | 43969184                             | 43969745 | HoxC BglF87                                          | GATGCAGTTTCTGTCTATCAGTGTACAGC       | 52603135                             | 52605457 |
| HoxB BglF52                      | GGTCAATGAGGTGAAGGCGTTCATGAAGC       | 43969746                             | 43983290 | HoxC BglF88                                          | CTAAAGTTTCTTCTAGCTATAGTCTTAGG       | 52602340                             | 52603134 |
| HoxB BglF53                      | CAGCAAGTTTTGGGAGCTGGAGGTAACC        | 43983291                             | 43987251 | HoxC BglF89                                          | CAGTGTACTACAAACTGGGTAACAGAGC        | 52597569                             | 52602339 |
| HoxB BglF55                      | GGGTGGGAGCTATTTTTCTGTGTTTATTAGC     | 43987305                             | 43990264 | HoxC BglF90                                          | CCTCTTTATCAAGCCACCCAGGAATTTGC       | 52594432                             | 52597568 |
| HoxB BglF56                      | GAGGGAAGAAGTCAAAGGTTGGGAGG          | 43990265                             | 44003885 | HoxC BglF91                                          | GCAATAAACCCCTTAACCAAGTCTTCTTGC      | 52593460                             | 52594431 |
| HoxB BglF57                      | GGATCTTGTGTTGGGGCAACTTGTGGTC        | 44003886                             | 44009216 | HoxC BglF92                                          | GTTGAAGATGTGCATACCCCATCATCTGCC      | 52585275                             | 52593459 |
| HoxB BglF58                      | GCGGAGTGTTTATGTCAACTACATATCCCC      | 44009217                             | 44012306 | <b>4. Gene desert (Encode region ENR313 Chr. 16)</b> |                                     |                                      |          |
| HoxB BglF59                      | CTCAACTCCCTAGGCTTGAGAACTCTTG        | 44012307                             | 44013496 | GD BglF34                                            | GTGATGTTAAATGAAGGATTGGCAACAGGAG     | 60835052                             | 60838561 |
| HoxB BglF60                      | GAGTCTCTCAGGCATGCTCATGAGC           | 44013497                             | 44016543 | GD BglF35                                            | GGGGTACGCCTGATAGGAATATTACAAGG       | 60838562                             | 60841364 |
| HoxB BglF61                      | CCTCAGAGTCCCTTAGGAGAAATATCC         | 44016544                             | 44019680 | GD BglF36                                            | CAGGCTTTATTTCCATTCCTTAATTGAGTCCC    | 60841365                             | 60843243 |
| HoxB BglF62                      | GAGCTCATTTCTGACTAGCCCTGTCTTCC       | 44019681                             | 44019964 | GD BglF37                                            | GATGACACAGAGAAAATGTGGTGCATTCACC     | 60843244                             | 60846741 |
| HoxB BglF63                      | CTAGTGGAAAGACCAGGATGAAGTCTAGC       | 44019965                             | 44023541 | GD BglF39                                            | GCTGTGCATACCCCTAAAGATTTGGTAAAGCC    | 60847305                             | 60847852 |
| HoxB BglF64                      | GCCAGGCTCATACTTTTCAATTTGTTGTCC      | 44023542                             | 44024661 | GD BglF40                                            | GCACATCACACAAACCAACAGGAAAC          | 60847853                             | 60849318 |
| HoxB BglF65                      | GGTGAGAAGAGTTCTCCGCCTAAGATAAGC      | 44024662                             | 44031190 | GD BglF41                                            | CTCTCTCTCACATACAAGATGGGAGC          | 60849319                             | 60851533 |
| HoxB BglF66                      | CTAGAGAGGACTAGGGCCATTTGAAACAGG      | 44031191                             | 44032711 | GD BglF42                                            | CAACTGCTCCTCAGTAGTGACTTTTTGGG       | 60851534                             | 60857366 |
| HoxB BglF67                      | CCTTTTTATATGCCCTAGAGGAAGCCGC        | 44032712                             | 44034978 | GD BglF43                                            | CATCCAAATGAAGCCCAACTTCAAGAATGCAATC  | 60857367                             | 60858960 |
| HoxB BglF68                      | GACACAAGTGAATCTAAGGGAGCCAGAAAGG     | 44034979                             | 44046148 | GD BglF45                                            | CCAATTCATTTAAACATGAGCATGCACTGAGC    | 60859657                             | 60861091 |
| HoxB BglF69                      | GAGAGAGAGAAAAACCCGGAATTCGCCG        | 44046149                             | 44047255 | GD BglF46                                            | GTCTACAAATATGATCTCCCTTTCAAGTCCAC    | 60861092                             | 60861612 |
| HoxB BglF70                      | GGTGACGAAGCCGAAATGAGAAATGATTAGG     | 44047256                             | 44048594 | GD BglF47                                            | CAGTGTCTTTCAGATTCTACTAGTCTTACTGG    | 60861613                             | 60863515 |
| HoxB BglF71                      | GAGTAAGCTTCCATCTGATGCTTAGGTGG       | 44048595                             | 44053925 | GD BglF48                                            | CATGAGTACAAAAATGGCTCTTATGATCC       | 60863516                             | 60866664 |
| HoxB BglF72                      | CAGAAAAGGAAGCCGATGACCCCTGCGAGG      | 44053926                             | 44057561 | GD BglF49                                            | CTTCTTTGTAAGCTGTAATTAACAGGAGCCACC   | 60866665                             | 60868158 |
| HoxB BglF73                      | CTCTGAAAAGTTCTGGATGTAGTTGAGAGC      | 44057562                             | 44064710 | GD BglF50                                            | CAGGAGGCCGAGTTATGCTACCCATTGG        | 60868159                             | 60869137 |
| HoxB BglF74                      | GCCTCTTTGATATACCTGCTCAGTCTCTGC      | 44064711                             | 44065376 | GD BglF51                                            | CACCATATCTGGCCACTATAATAGATTTCTGACTC | 60869138                             | 60874749 |
| HoxB BglF75                      | GCATTTGGGCTTGGAAATAGCCAGTTAATGCC*   | 44065377                             | 44070696 | GD BglF52                                            | GATGAGAGAAAGGTGGTCTTATGAGAACATATGC  | 60874750                             | 60878548 |
| HoxB BglF77                      | GGGTTTGGAGTGAAGTATGTGGGAGGG         | 44070697                             | 44072427 | GD BglF53                                            | CTTTTGGGAACAGCCATTTGGCAAAAGTCC      | 60878549                             | 60883452 |
| HoxB BglF78                      | CTCTGGACTCTGGGACTCTGATGACTAGG       | 44072428                             | 44075054 | GD BglF54                                            | CATCGGGTAGGAATACCTCCCATACTACC       | 60883453                             | 60887859 |
| HoxB BglF80                      | GGTCTTTTCAGTTTTCTGGCTAAATCTGCG      | 44075093                             | 44076323 | GD BglF55                                            | CAGTCAAACCTAGATACGCAGAGGCAAGG       | 60887860                             | 60899665 |
| HoxB BglF81                      | GGGTTTGTGTAATCTTGAATGAGGTTTTTTCG    | 44076324                             | 44082501 | GD BglF57                                            | GCACACCTGTTTCAGACTAGGCTCCTCC        | 60901176                             | 60903390 |
| HoxB BglF83                      | GGTCAGGATTTCTTCAATTTCAACTACTGTTGG   | 44082502                             | 44087225 | GD BglF58                                            | CATCTCACTGCCATAAAGCACTTCAAGATGG     | 60903391                             | 60908428 |
| HoxB BglF84                      | GGAGGGAGCCAGTAATTTAGTAGTATAGAAGC    | 44087226                             | 44091634 |                                                      |                                     |                                      |          |
| HoxB BglF85                      | CAGGGTTAGGGGCCACTTTCATGACAGC        | 44091635                             | 44094179 |                                                      |                                     |                                      |          |
| HoxB BglF86                      | CTTGAGGGAATCTCAATGGTCTATGAGGC       | 44094180                             | 44099475 |                                                      |                                     |                                      |          |

<sup>a</sup> corresponds to position in human genome sequence version 18.

## Supplementary Table 2 Human 3C primer sequences for HoxD analysis in BgIII and HindIII 3C libraries

| Primer Name                                   | Primer Sequence (5'-3')              | BgIII fragment position <sup>a</sup> |           | Primer Name  | Primer Sequence (5'-3')             | HindIII fragment position <sup>a</sup> |           |
|-----------------------------------------------|--------------------------------------|--------------------------------------|-----------|--------------|-------------------------------------|----------------------------------------|-----------|
|                                               |                                      | start                                | end       |              |                                     | start                                  | end       |
| 1. HoxD cluster (Chr. 2)                      |                                      |                                      |           |              |                                     |                                        |           |
| HoxD BglF47                                   | CACATAGGTCATACATGAGGTATGCTTGG        | 176786769                            | 176794243 | HoxD Hind76  | CACTAACTTGAACCATCCACATCCTGGG        | 176767257                              | 176769904 |
| HoxD BglF48                                   | CAATGTAACATAAATCCCTGCCCTACCAGG       | 176784080                            | 176786768 | HoxD Hind77  | CAGAGGTCACCTAGTTCATCCCGATCTCC       | 176765801                              | 176767256 |
| HoxD BglF49                                   | CTTTAAAGTCTCCCTCCATACCTCAGTCC        | 176777979                            | 176784079 | HoxD Hind79  | GTATACACCTGCCACAATTCATTAGCC         | 176754265                              | 176765654 |
| HoxD BglF50                                   | GACAGAACGGAGCATTCACTTCAGAATCC        | 176768993                            | 176777978 | HoxD Hind80  | CTCTATACTACACCATCCACACAGGGC         | 176753783                              | 176754264 |
| HoxD BglF51                                   | GTATTCACTCTGTAAACAGATCACTGGAGGG      | 176766147                            | 176768992 | HoxD Hind81  | CAAGAACTCCAGATGAAGAGGACCTTCC        | 176749498                              | 176753782 |
| HoxD BglF52                                   | CTTTTTGATGTGCAGCTGCCCTTCTCAGG        | 176764529                            | 176766146 | HoxD Hind82  | GCCCATTTTTGTATAAAGAACAGGAGTAAACAAGG | 176746547                              | 176749497 |
| HoxD BglF53                                   | GTGGAACACTCCTTATGCTCCTTCTGG          | 176760706                            | 176764528 | HoxD Hind83  | GAGCAACGATTCTCCCTTCTCCTGTTGGC       | 176737444                              | 176746546 |
| HoxD BglF54                                   | CAGGTAAAAACTGCCTGTACCAGAGC           | 176750510                            | 176760705 | HoxD Hind84  | GTGGTCGTTTCTGGATTGGAGAGAGCC         | 176733563                              | 176737443 |
| HoxD BglF56                                   | GCAGAAAGTGCAGAGGACTTATGTACCC         | 176749897                            | 176750467 | HoxD Hind85  | GTCTCGCACCTTTCAGGAATTACTTACG        | 176731864                              | 176733562 |
| HoxD BglF57                                   | TGATTTATGGCGAGTCAACCAAGGACG          | 176745185                            | 176749896 | HoxD Hind86  | CGGTTTTTTACAACCTCTGTTGCTTGGAGC      | 176730585                              | 176731863 |
| HoxD BglF59                                   | CTGGAAGGCTCCCTCTGTCAAAGAAGG          | 176743976                            | 176744667 | HoxD Hind87  | GAACAAGCCTACAGAGAACTCTTTTTTCCC      | 176727467                              | 176730584 |
| HoxD BglF60                                   | CATATGACCTCCAAGGTTGCATTTCCAGC        | 176742567                            | 176743975 | HoxD Hind88  | GAGTAACCGCCATGCTTCTACCAGTGC         | 176723799                              | 176727466 |
| HoxD BglF61                                   | GACTTGCAGACTTCCAGACTCATTTTGGAG       | 176740374                            | 176742566 | HoxD Hind89  | CGACTTGTTCAGACAGGTCAAAGCCAACG       | 176721871                              | 176723798 |
| HoxD BglF62                                   | CTTCTATAAGGTCGTCAGGTCCTGTGG          | 176725747                            | 176740373 | HoxD Hind90  | GCTAATTAGCAAGCTTTAACAGAAGTGAGCG     | 176720831                              | 176721870 |
| HoxD BglF63                                   | GAGGAAGGTCAAAGCCACTTCTTATTTGC        | 176718675                            | 176725746 | HoxD Hind91  | GAGCTTGGAACTTCACTCAAGAAGCAGG        | 176712617                              | 176720830 |
| HoxD BglF64                                   | GTGGCCACCAACAGTGTAAAACGTGTGG         | 176717939                            | 176718674 | HoxD Hind92  | CTAACTTTGCTGGAGGGAACCCGAGCAGC       | 176707878                              | 176712616 |
| HoxD BglF65                                   | GGTGAATACTGTCTTTGTTCCGATTTCCCTTGC    | 176712037                            | 176717938 | HoxD Hind93  | CTGTGACTGTCAACAAGTCAAGAGCAGC        | 176699966                              | 176707877 |
| HoxD BglF66                                   | GTTCAGTTCAGCAGTTTTGAAGTTGAGG         | 176710807                            | 176712036 | HoxD Hind94  | CCAGAGGAACAGACACTTTGGCAACC          | 176699633                              | 176699965 |
| HoxD BglF68                                   | GGCATCTTTGTAGAAGTGTGATTCCTCG         | 176700459                            | 176710731 | HoxD Hind95  | GCCAGAAATCACCAGATGCCACTGAAAGC       | 176693282                              | 176699632 |
| HoxD BglF69                                   | CCTCGGCTCTCCTGTTTTCAAAGAGCC          | 176698663                            | 176700458 | HoxD Hind96  | CATGATCATTGGGCTCAAGGCAAAACTGG       | 176690783                              | 176693281 |
| HoxD BglF70                                   | CAGAGTTCGTGGAGGACCTTGAACAGG          | 176698025                            | 176698662 | HoxD Hind97  | CCTATTAGAATCCAGTGTGGACAGACAAGG      | 176684300                              | 176690782 |
| HoxD BglF71                                   | CATTACAACCTGGTCTCGGCAGGAACC          | 176697695                            | 176698024 | HoxD Hind98  | GACACTGTCTGGCAGCTCTCGTAAAAGC        | 176677295                              | 176684299 |
| HoxD BglF72                                   | GATGCCACATTAATAATGACATGATGGCAGG      | 176691586                            | 176697694 | HoxD Hind99  | GTAACCTGCTGGTATCAAGGATTTAGCAGG      | 176675771                              | 176677294 |
| HoxD BglF73                                   | GAGTTTGTGCGCTTATCAGAATACATGCAGC      | 176690066                            | 176691585 | HoxD Hind100 | GCAAAAGGCCTCAAAACAGAAAATCTAGTGCC    | 176669406                              | 176675770 |
| HoxD BglF74                                   | GGGTTTAAACATTACCTTTCCACAGGGGTGG      | 176687205                            | 176690065 | HoxD Hind101 | CTGGGATATTCGGAGCACCTAGCTGAGG        | 176667195                              | 176669405 |
| HoxD BglF75                                   | CTCAAACTTTACAGACCCGAATACCAGC         | 176675684                            | 176687204 | HoxD Hind103 | CTGCCTTAGGAACAATATTAGATCCAATGAGC    | 176664233                              | 176667023 |
| HoxD BglF76                                   | CCAGCTGGAATAGGCCAGCCTATTTCCG         | 176674316                            | 176675683 | HoxD Hind104 | GAGTAATGCAGGGTACAGCTGCTGCAGG        | 176648489                              | 176664232 |
| HoxD BglF77                                   | GGATTTGGCTGAGGAGCGAATAGAGAGC         | 176670609                            | 176674315 |              |                                     |                                        |           |
| HoxD BglF78                                   | GTTTGGGTATTTTCATCAAAGAGCATCAACAGGGAG | 176660295                            | 176670608 |              |                                     |                                        |           |
| HoxD BglF79                                   | GCCGAGGGGAACAGAAGATAAACTTTTGGC       | 176658691                            | 176660294 |              |                                     |                                        |           |
| HoxD BglF80                                   | CTGCTATCAAATCGTCCAGCCTAGTTCCG        | 176657859                            | 176658690 |              |                                     |                                        |           |
| 2. Gene desert (Encode region ENr313 Chr. 16) |                                      |                                      |           |              |                                     |                                        |           |
| GD Hind F28                                   | GATACTTATACCTTGAGGCTAGAGACAGGC       | 60825408                             | 60839352  |              |                                     |                                        |           |
| GD Hind F29                                   | GGTCTGAGGATTACTACCTGTGGAAAGC         | 60839353                             | 60841760  |              |                                     |                                        |           |
| GD Hind F30                                   | CAATAGGACTCAATTGCTTTAAGTTCTCTGG      | 60841761                             | 60847237  |              |                                     |                                        |           |
| GD Hind F31                                   | GTATAACAAACCTCCATGGAACATGTTACC       | 60847238                             | 60854675  |              |                                     |                                        |           |
| GD Hind F33                                   | GAAATGACCAAGAAGACATTACTATTGACCC      | 60854745                             | 60857748  |              |                                     |                                        |           |
| GD Hind F34                                   | CTAGGGTATACAAAATGAGATGAGAGAGGG       | 60857749                             | 60863902  |              |                                     |                                        |           |
| GD Hind F35                                   | CAGGATGTTTGGCAACACTGTTGTGTGAGG       | 60863903                             | 60864738  |              |                                     |                                        |           |
| GD Hind F36                                   | CAAAATGCCATGTATTGAGAAGCAGCTAAGG      | 60864739                             | 60869243  |              |                                     |                                        |           |
| GD Hind F37                                   | GGAAGTGAGTCTAAATCTGCTCCTGTGGAC       | 60869244                             | 60871568  |              |                                     |                                        |           |
| GD Hind F38                                   | CAGAGTAAGAAGACAACCTCCATCTGCCACG      | 60871569                             | 60876856  |              |                                     |                                        |           |
| GD Hind F39                                   | CATGGATTTACTTTGAGTATGCACCAGCC        | 60876857                             | 60879766  |              |                                     |                                        |           |
| GD Hind F40                                   | GCTGCAATTTCTCTAATTTCCATACCACC        | 60879767                             | 60880485  |              |                                     |                                        |           |
| GD Hind F41                                   | GGCTTAGGAAAAACACATGCAGAAGC           | 60880486                             | 60881926  |              |                                     |                                        |           |
| GD Hind F42                                   | GCTATTCATGGGGAAAGGGTAACTGAGG         | 60881927                             | 60884454  |              |                                     |                                        |           |
| GD Hind F43                                   | GTACAGGCTTTTAATTCAGACAGACCCG         | 60884455                             | 60889381  |              |                                     |                                        |           |
| GD Hind F44                                   | GCTTTCATATTTATCTTCTTCCAACCTACCACC    | 60889382                             | 60892213  |              |                                     |                                        |           |
| GD Hind F45                                   | GCCAATCACCATTCTATATTTGCATTGGTGG      | 60892214                             | 60892916  |              |                                     |                                        |           |
| GD Hind F46                                   | CAAAAGCCTGTGGGAGCTGACTATTACTGG       | 60892917                             | 60894162  |              |                                     |                                        |           |
| GD Hind F47                                   | CTTCCAGGACATCAATTCCTTGATGCTACC       | 60894163                             | 60895710  |              |                                     |                                        |           |
| GD Hind F48                                   | CTTTTAGTGAGTCTACTGCAGAACACTTCCC      | 60895711                             | 60904905  |              |                                     |                                        |           |
| GD Hind F49                                   | CTGCAACTGTCTGTGCACATTGTGGCC          | 60904906                             | 60905984  |              |                                     |                                        |           |
| GD Hind F50                                   | CAGAAGCAGTGTGAGTAATTCAGAGGTTCC       | 60905985                             | 60907740  |              |                                     |                                        |           |
| GD Hind F51                                   | CCTTCTCTATGCCACCGGTAGAATTCC          | 60907741                             | 60908483  |              |                                     |                                        |           |

<sup>a</sup>corresponds to position in human genome sequence version 18.

**Supplementary Table 3 3C datasets of transcriptionally silent human Hox clusters**

| Fragment 1                                        | Fragment 2 | Average IF  | s.e.m.      | no contacts |
|---------------------------------------------------|------------|-------------|-------------|-------------|
| <b>1. HoxA cluster (hChr. 7) BglII 3C library</b> |            |             |             |             |
| 47                                                | 51         | 0.414194445 | 0           | 1           |
| 47                                                | 73         | 0.322412505 | 0.046490454 | 4           |
| 48                                                | 51         | 0.482283377 | 0.065933482 | 4           |
| 48                                                | 52         | 0.402829519 | 0           | 2           |
| 48                                                | 53         | 0.270229157 | 0.012441755 | 3           |
| 49                                                | 51         | 0.435287278 | 0.019700641 | 9           |
| 49                                                | 53         | 0.345776014 | 0.018578581 | 6           |
| 50                                                | 51         | 1.033674    | 0.045216309 | 6           |
| 50                                                | 52         | 0.408951441 | 0.032247265 | 9           |
| 50                                                | 61         | 0.563337406 | 0.009093233 | 4           |
| 50                                                | 73         | 0.242977425 | 0           | 2           |
| 51                                                | 52         | 0.508432889 | 0.014494916 | 15          |
| 51                                                | 53         | 0.350714829 | 0.026353801 | 4           |
| 51                                                | 55         | 0.499060169 | 0.03200887  | 9           |
| 51                                                | 58         | 0.547624209 | 0.025439577 | 4           |
| 51                                                | 61         | 0.348828064 | 0.022713966 | 8           |
| 51                                                | 63         | 0.487562296 | 0.009754516 | 6           |
| 51                                                | 65         | 0.499858403 | 0.018636574 | 9           |
| 51                                                | 66         | 0.256831633 | 0           | 2           |
| 51                                                | 68         | 0.289501383 | 0.025371782 | 6           |
| 51                                                | 71         | 0.41029731  | 0.033620065 | 6           |
| 51                                                | 73         | 0.542177454 | 0.027344585 | 12          |
| 51                                                | 76         | 0.420373683 | 0.013567676 | 6           |
| 52                                                | 53         | 1.038519978 | 0.053390628 | 13          |
| 52                                                | 55         | 0.69389344  | 0.020397082 | 9           |
| 52                                                | 58         | 0.775872533 | 0.029673209 | 6           |
| 52                                                | 59         | 0.52346826  | 0.019732379 | 6           |
| 52                                                | 61         | 0.724593987 | 0.074806142 | 13          |
| 52                                                | 62         | 0.314587093 | 0.027666771 | 4           |
| 52                                                | 63         | 0.64342892  | 0           | 2           |
| 52                                                | 64         | 0.697230857 | 0.036087796 | 6           |
| 52                                                | 65         | 0.640347287 | 0.038656013 | 9           |
| 52                                                | 66         | 0.338518941 | 0.024424181 | 6           |
| 52                                                | 67         | 0.337769366 | 0.021397269 | 6           |
| 52                                                | 68         | 0.494818316 | 0.043878939 | 4           |
| 52                                                | 69         | 0.763626681 | 0.076160005 | 9           |
| 52                                                | 70         | 0.66029296  | 0.004580538 | 3           |
| 52                                                | 71         | 0.720223959 | 0.036186498 | 6           |
| 52                                                | 72         | 0.829160023 | 0.012924961 | 4           |
| 52                                                | 73         | 1.084580535 | 0.042895478 | 15          |
| 52                                                | 74         | 0.235675703 | 0           | 2           |
| 52                                                | 75         | 0.529297544 | 0.049946141 | 9           |
| 52                                                | 76         | 0.825180961 | 0.033929037 | 4           |
| 52                                                | 78         | 0.463784789 | 0.019153342 | 9           |
| 52                                                | 79         | 0.58038402  | 0.072952465 | 6           |
| 52                                                | 80         | 0.531771375 | 0.020988545 | 9           |
| 52                                                | 81         | 0.663207012 | 0.005313093 | 4           |
| 52                                                | 82         | 0.445118597 | 0           | 1           |
| 52                                                | 87         | 0.310519631 | 0.004342971 | 6           |
| 52                                                | 88         | 0.435821776 | 0.028146321 | 6           |

|    |    |             |             |    |
|----|----|-------------|-------------|----|
| 52 | 93 | 0.225671988 | 0.025592371 | 3  |
| 53 | 55 | 0.770370148 | 0.004649755 | 4  |
| 53 | 58 | 0.449916677 | 0.037488151 | 9  |
| 53 | 60 | 0.690134132 | 0.028443537 | 6  |
| 53 | 61 | 0.607170389 | 0.072937046 | 4  |
| 53 | 63 | 0.525576101 | 0.076914249 | 4  |
| 53 | 64 | 0.700140564 | 0.038099486 | 6  |
| 53 | 65 | 0.506411622 | 0.064739597 | 6  |
| 53 | 67 | 0.282775704 | 0.006209215 | 3  |
| 53 | 68 | 0.320903328 | 0.023538446 | 6  |
| 53 | 69 | 0.16303447  | 0.02728403  | 9  |
| 53 | 71 | 0.529743303 | 0.015657752 | 9  |
| 53 | 73 | 1.134705687 | 0.142641223 | 12 |
| 53 | 74 | 0.288815145 | 0.01094816  | 6  |
| 53 | 76 | 0.868908089 | 0.036999764 | 9  |
| 53 | 77 | 0.562211603 | 0.035766446 | 9  |
| 53 | 78 | 0.58062122  | 0.043479465 | 6  |
| 53 | 79 | 0.413020902 | 0           | 2  |
| 53 | 80 | 0.602665666 | 0.043227608 | 6  |
| 53 | 82 | 0.590987046 | 0.028887168 | 6  |
| 53 | 87 | 0.290412537 | 0.020952852 | 6  |
| 53 | 88 | 0.421198425 | 0.007395883 | 6  |
| 55 | 60 | 0.622649093 | 0.044308693 | 9  |
| 55 | 61 | 0.983719794 | 0.062129744 | 6  |
| 55 | 62 | 0.068322544 | 0.003728017 | 6  |
| 55 | 63 | 0.967874346 | 0.082655612 | 9  |
| 55 | 73 | 1.246116158 | 0.140115267 | 4  |
| 58 | 60 | 1.456676874 | 0.030385639 | 6  |
| 58 | 62 | 0.291341819 | 0.019253966 | 6  |
| 58 | 63 | 1.16276911  | 0.169746954 | 9  |
| 58 | 64 | 0.927935783 | 0.055141313 | 9  |
| 59 | 60 | 1.692871419 | 0.051181111 | 4  |
| 59 | 62 | 0.53860932  | 0.052747068 | 6  |
| 59 | 63 | 0.935437616 | 0           | 1  |
| 59 | 64 | 1.130799851 | 0.033570548 | 9  |
| 59 | 65 | 1.168336633 | 0.140758484 | 9  |
| 60 | 61 | 4.45667491  | 0.208148665 | 24 |
| 60 | 62 | 1.368815028 | 0.039005937 | 18 |
| 60 | 63 | 1.367139369 | 0.073510047 | 13 |
| 60 | 64 | 1.005669365 | 0.056404864 | 42 |
| 60 | 65 | 1.672915141 | 0.200179713 | 18 |
| 60 | 66 | 1.071661134 | 0.162069557 | 30 |
| 60 | 67 | 0.414862448 | 0.067250317 | 27 |
| 60 | 68 | 0.52303337  | 0.023134308 | 15 |
| 60 | 69 | 0.506726511 | 0.02054491  | 6  |
| 60 | 70 | 0.422921906 | 0.05688156  | 12 |
| 60 | 71 | 0.732098883 | 0.055638696 | 9  |
| 60 | 72 | 0.728582568 | 0.069139937 | 3  |
| 60 | 73 | 0.299345285 | 0.022614939 | 15 |
| 60 | 74 | 0.103836314 | 0.02569295  | 9  |
| 60 | 75 | 0.277610277 | 0.025736797 | 9  |
| 60 | 76 | 0.570550628 | 0.112497304 | 9  |
| 60 | 77 | 0.299179524 | 0.030591859 | 9  |
| 60 | 78 | 0.370263656 | 0.015409257 | 9  |

|    |    |             |             |    |
|----|----|-------------|-------------|----|
| 60 | 79 | 0.326590433 | 0.012975354 | 9  |
| 60 | 81 | 0.211006825 | 0.022538128 | 9  |
| 60 | 82 | 0.398271981 | 0.026126504 | 15 |
| 61 | 62 | 3.230853012 | 0.191737719 | 15 |
| 61 | 63 | 3.183482973 | 0.241574826 | 36 |
| 61 | 64 | 2.687491108 | 0.314049749 | 13 |
| 61 | 65 | 1.200765467 | 0.105491277 | 9  |
| 61 | 66 | 0.886294211 | 0.125499109 | 9  |
| 61 | 67 | 0.789002954 | 0.084160314 | 12 |
| 61 | 68 | 0.533791866 | 0.023340051 | 4  |
| 61 | 69 | 0.503471963 | 0.054569281 | 6  |
| 61 | 70 | 0.467885947 | 0.036743662 | 15 |
| 61 | 71 | 0.879885635 | 0.110225362 | 9  |
| 61 | 72 | 0.470061836 | 0.072749348 | 13 |
| 61 | 73 | 0.616486508 | 0.060238001 | 6  |
| 61 | 77 | 0.372281225 | 0.06040483  | 9  |
| 61 | 79 | 0.220167828 | 0.059385156 | 6  |
| 61 | 82 | 0.215139953 | 0.016028258 | 18 |
| 62 | 63 | 1.08940284  | 0.032665377 | 21 |
| 62 | 64 | 0.184160439 | 0.015798601 | 15 |
| 62 | 65 | 0.302487273 | 0.019116152 | 9  |
| 62 | 70 | 0.100848226 | 0.008066981 | 9  |
| 62 | 71 | 0.11492603  | 0.005821974 | 9  |
| 62 | 73 | 0.082240041 | 0.007323438 | 6  |
| 62 | 82 | 0.067278458 | 0.001441366 | 6  |
| 63 | 64 | 1.930621761 | 0.072209916 | 6  |
| 63 | 65 | 2.511194401 | 0.201670468 | 18 |
| 63 | 66 | 1.054221571 | 0.065247303 | 15 |
| 63 | 67 | 0.325495806 | 0.024857864 | 24 |
| 63 | 68 | 0.865693839 | 0.186880563 | 3  |
| 63 | 69 | 0.617794743 | 0.106477359 | 15 |
| 63 | 70 | 0.670303359 | 0.09381115  | 10 |
| 63 | 71 | 0.757113662 | 0.060305679 | 9  |
| 63 | 72 | 0.73979845  | 0.028229854 | 6  |
| 63 | 73 | 1.674403868 | 0.277674135 | 4  |
| 63 | 74 | 0.183609089 | 0.02638284  | 9  |
| 63 | 75 | 0.256024594 | 0.017806475 | 9  |
| 63 | 76 | 0.352035877 | 0.027150116 | 6  |
| 63 | 77 | 0.344171632 | 0.029362949 | 9  |
| 63 | 78 | 0.29312008  | 0.0180315   | 9  |
| 63 | 79 | 0.300389456 | 0.014933219 | 9  |
| 63 | 80 | 0.254222611 | 0.061161813 | 6  |
| 63 | 81 | 0.391994854 | 0.066182174 | 9  |
| 63 | 82 | 0.336018381 | 0.024998831 | 9  |
| 64 | 65 | 5.971019576 | 0.407797376 | 18 |
| 64 | 68 | 1.648341853 | 0.219451797 | 9  |
| 64 | 69 | 0.748140488 | 0.079585265 | 9  |
| 64 | 70 | 0.409112252 | 0.020766929 | 15 |
| 64 | 71 | 1.604835564 | 0.210186709 | 6  |
| 64 | 72 | 1.053528306 | 0.082217397 | 15 |
| 64 | 73 | 0.599436342 | 0.046887967 | 18 |
| 64 | 74 | 0.296619394 | 0.04295461  | 6  |
| 64 | 75 | 0.236824787 | 0.029968383 | 6  |
| 64 | 76 | 0.087222541 | 0.003105728 | 6  |

|    |    |             |             |    |
|----|----|-------------|-------------|----|
| 64 | 77 | 0.26775705  | 0.047999112 | 9  |
| 64 | 78 | 0.321615502 | 0.01760215  | 6  |
| 64 | 79 | 0.324599374 | 0.009163773 | 9  |
| 64 | 81 | 0.228437908 | 0.039984669 | 3  |
| 64 | 82 | 0.322196409 | 0.026829913 | 9  |
| 65 | 66 | 7.480581844 | 0.532226335 | 9  |
| 65 | 67 | 2.795064778 | 0.365882002 | 9  |
| 65 | 68 | 1.866088391 | 0.168406628 | 15 |
| 65 | 69 | 1.762617924 | 0.12850221  | 9  |
| 65 | 71 | 2.089831491 | 0.09611347  | 15 |
| 65 | 72 | 1.254867771 | 0.033678652 | 9  |
| 65 | 73 | 2.261379291 | 0.198170461 | 6  |
| 65 | 74 | 0.55581326  | 0.024768115 | 9  |
| 65 | 75 | 1.157782133 | 0.09731478  | 6  |
| 65 | 76 | 1.971223856 | 0.462596255 | 3  |
| 65 | 77 | 1.958696475 | 0.08316037  | 4  |
| 65 | 78 | 1.134593558 | 0.063956422 | 9  |
| 65 | 79 | 1.827079432 | 0.099120302 | 9  |
| 65 | 80 | 1.641681501 | 0.11192296  | 6  |
| 65 | 81 | 0.533428651 | 0.068829935 | 9  |
| 65 | 82 | 0.480007533 | 0.011588694 | 18 |
| 66 | 67 | 7.206744355 | 1.269303785 | 24 |
| 66 | 70 | 0.432299423 | 0.032484353 | 15 |
| 66 | 71 | 0.821088254 | 0.078663242 | 3  |
| 66 | 72 | 0.580983289 | 0.070467453 | 15 |
| 66 | 74 | 0.138078163 | 0.006198256 | 9  |
| 66 | 75 | 0.283655285 | 0           | 2  |
| 66 | 76 | 0.387196458 | 0.076478243 | 9  |
| 66 | 77 | 0.684481874 | 0.053764719 | 9  |
| 66 | 78 | 0.159869261 | 0.016529572 | 18 |
| 66 | 79 | 0.138316891 | 0.011844948 | 18 |
| 66 | 80 | 0.164659111 | 0.030390068 | 6  |
| 66 | 81 | 0.230857858 | 0.021770415 | 9  |
| 66 | 82 | 0.283435357 | 0.007397951 | 6  |
| 67 | 68 | 1.429402595 | 0.08279281  | 10 |
| 67 | 69 | 2.361025279 | 0.166434607 | 9  |
| 67 | 70 | 0.88775219  | 0.146208192 | 18 |
| 67 | 71 | 0.736290753 | 0.041384892 | 15 |
| 67 | 72 | 0.643034125 | 0.038193565 | 12 |
| 67 | 73 | 0.950210667 | 0.023217123 | 9  |
| 67 | 74 | 0.319429798 | 0.021889108 | 9  |
| 67 | 75 | 0.173827584 | 0.021225456 | 18 |
| 67 | 76 | 0.136129262 | 0.010435198 | 12 |
| 67 | 77 | 0.581822712 | 0.053302425 | 9  |
| 67 | 78 | 0.146336324 | 0.024184736 | 15 |
| 67 | 79 | 0.156894297 | 0.024069607 | 18 |
| 67 | 80 | 0.147253409 | 0.034145097 | 3  |
| 67 | 81 | 0.333922477 | 0.054824419 | 6  |
| 67 | 82 | 0.131464063 | 0.005973513 | 9  |
| 68 | 69 | 3.450940547 | 0.130373587 | 6  |
| 68 | 70 | 1.91760252  | 0.140647337 | 9  |
| 68 | 71 | 1.019901647 | 0.024468455 | 15 |
| 68 | 72 | 0.841778918 | 0.048621719 | 3  |
| 68 | 73 | 1.033270386 | 0.032348139 | 6  |

|    |    |             |             |    |
|----|----|-------------|-------------|----|
| 68 | 74 | 0.14031112  | 0.01464122  | 13 |
| 68 | 75 | 0.216998439 | 0.040690884 | 13 |
| 68 | 76 | 0.411455575 | 0.048278402 | 21 |
| 68 | 77 | 0.710372791 | 0.04339726  | 9  |
| 68 | 78 | 0.269618482 | 0.053687249 | 15 |
| 68 | 79 | 0.732857372 | 0.110833226 | 12 |
| 68 | 80 | 0.231938533 | 0.033960079 | 10 |
| 68 | 81 | 0.621344576 | 0.129810479 | 6  |
| 68 | 82 | 0.243802449 | 0.014432211 | 9  |
| 69 | 70 | 3.561994897 | 0.211859573 | 18 |
| 69 | 71 | 1.81224299  | 0.130431661 | 24 |
| 69 | 73 | 1.792351047 | 0.085953533 | 9  |
| 69 | 74 | 0.6595067   | 0.158880954 | 6  |
| 69 | 76 | 0.934912757 | 0.15135422  | 4  |
| 69 | 78 | 1.089852043 | 0.186131027 | 18 |
| 69 | 79 | 1.157283237 | 0.180672783 | 6  |
| 69 | 80 | 4.86069545  | 0.47231656  | 9  |
| 69 | 82 | 0.102658966 | 0.012970953 | 9  |
| 70 | 71 | 1.233151835 | 0.027585977 | 14 |
| 70 | 72 | 1.057379828 | 0.072199794 | 3  |
| 70 | 74 | 0.801662966 | 0.068816672 | 6  |
| 70 | 75 | 1.307659574 | 0           | 1  |
| 70 | 76 | 0.456471409 | 0.050013966 | 9  |
| 70 | 77 | 0.920192132 | 0.025405181 | 15 |
| 70 | 78 | 0.947409889 | 0.025218559 | 12 |
| 70 | 79 | 0.947574416 | 0.144685738 | 3  |
| 70 | 80 | 3.487517886 | 0.749609751 | 9  |
| 70 | 81 | 0.236372816 | 0.017624332 | 6  |
| 70 | 82 | 0.509038819 | 0.020125444 | 18 |
| 71 | 72 | 0.998139494 | 0.015867797 | 16 |
| 71 | 73 | 1.665696566 | 0.15093774  | 15 |
| 71 | 75 | 1.954598509 | 0.116285792 | 18 |
| 71 | 76 | 1.75501778  | 0.110756314 | 21 |
| 71 | 77 | 0.936461153 | 0.015330918 | 11 |
| 71 | 79 | 0.7828894   | 0.027802879 | 12 |
| 71 | 80 | 1.436208625 | 0.023229439 | 9  |
| 71 | 82 | 0.502032036 | 0.0256664   | 18 |
| 71 | 88 | 0.657877814 | 0.010750486 | 9  |
| 72 | 73 | 1.572196044 | 0.069432023 | 9  |
| 72 | 74 | 1.406649628 | 0.062996236 | 6  |
| 72 | 75 | 1.652735993 | 0.119747873 | 10 |
| 72 | 76 | 2.351327314 | 0.13213865  | 18 |
| 72 | 77 | 0.892791311 | 0.028726189 | 10 |
| 72 | 78 | 1.106041921 | 0.067598917 | 7  |
| 72 | 79 | 0.743536609 | 0.021767146 | 4  |
| 72 | 80 | 1.97788457  | 0.063140852 | 6  |
| 72 | 82 | 0.878453766 | 0.013115261 | 4  |
| 73 | 74 | 2.072473765 | 0.06317638  | 4  |
| 73 | 75 | 9.081264902 | 1.500179359 | 10 |
| 73 | 76 | 12.65854275 | 1.095366515 | 15 |
| 73 | 77 | 1.316081613 | 0.070457465 | 7  |
| 73 | 78 | 1.512895205 | 0.099635607 | 15 |
| 73 | 79 | 1.211374583 | 0           | 2  |
| 73 | 80 | 4.065999732 | 0.361642193 | 12 |

|    |    |             |             |    |
|----|----|-------------|-------------|----|
| 73 | 82 | 0.717293482 | 0.11892534  | 11 |
| 73 | 87 | 0.757509635 | 0.105465617 | 6  |
| 73 | 88 | 0.614910304 | 0.033016059 | 6  |
| 73 | 93 | 0.322353632 | 0.03368495  | 4  |
| 74 | 75 | 9.39432081  | 0.614630577 | 9  |
| 74 | 76 | 7.790409344 | 0.824259626 | 9  |
| 74 | 77 | 1.454569604 | 0.173243811 | 11 |
| 74 | 78 | 0.644867527 | 0.072574369 | 12 |
| 74 | 80 | 1.116073046 | 0.253430195 | 6  |
| 74 | 82 | 0.266843777 | 0.0139702   | 18 |
| 75 | 76 | 13.6915759  | 0.803865396 | 18 |
| 75 | 77 | 2.226200261 | 0.242996854 | 15 |
| 75 | 78 | 1.782634725 | 0.147039533 | 9  |
| 75 | 79 | 1.98837385  | 0.23314637  | 4  |
| 75 | 80 | 1.667258038 | 0.308971045 | 4  |
| 75 | 82 | 0.444322131 | 0.008264697 | 6  |
| 76 | 77 | 3.646078421 | 0.399125286 | 6  |
| 76 | 78 | 2.975304492 | 0.358469664 | 15 |
| 76 | 79 | 3.71189538  | 0.404132861 | 9  |
| 76 | 80 | 2.026248283 | 0.459702363 | 6  |
| 76 | 82 | 0.438980792 | 0.021309842 | 9  |
| 77 | 78 | 1.246767732 | 0.098301826 | 11 |
| 77 | 80 | 1.901806781 | 0.216985268 | 24 |
| 77 | 82 | 0.668277664 | 0.043411832 | 21 |
| 77 | 87 | 0.5928332   | 0.012691578 | 4  |
| 77 | 88 | 0.753749006 | 0.02137388  | 6  |
| 78 | 79 | 1.220649309 | 0.08393796  | 9  |
| 78 | 80 | 2.4891864   | 0.13611383  | 12 |
| 78 | 81 | 4.586875726 | 0.287105289 | 3  |
| 78 | 82 | 0.813537664 | 0.014812253 | 18 |
| 79 | 80 | 3.629343792 | 0.226700493 | 9  |
| 79 | 82 | 1.079302684 | 0.018528068 | 9  |
| 80 | 82 | 0.462242373 | 0.095234501 | 9  |
| 80 | 87 | 3.11261305  | 0.801832267 | 9  |
| 81 | 82 | 1.295838184 | 0.090118851 | 9  |

## 2. HoxB cluster (hChr. 17) BgIII 3C library

|    |    |             |             |    |
|----|----|-------------|-------------|----|
| 49 | 50 | 3.94464834  | 0.493744051 | 9  |
| 49 | 52 | 0.380715059 | 0.029796363 | 9  |
| 49 | 55 | 0.471149847 | 0.071599459 | 10 |
| 49 | 56 | 0.088108728 | 0.004319589 | 9  |
| 49 | 58 | 0.386284542 | 0.028042481 | 9  |
| 49 | 59 | 0.628978555 | 0.105687995 | 6  |
| 49 | 60 | 0.25145725  | 0.037469743 | 9  |
| 49 | 61 | 0.288632272 | 0.026763982 | 9  |
| 49 | 62 | 0.243953822 | 0.012139122 | 6  |
| 49 | 63 | 0.212289274 | 0.021231924 | 9  |
| 49 | 66 | 0.297382357 | 0.057476754 | 9  |
| 49 | 67 | 0.483835694 | 0.04953558  | 9  |
| 49 | 68 | 0.038192384 | 0.002523056 | 9  |
| 49 | 69 | 0.46263655  | 0.021828268 | 6  |
| 49 | 71 | 0.445612374 | 0.059526829 | 4  |
| 49 | 72 | 0.316057114 | 0.04030683  | 9  |
| 49 | 73 | 0.100291557 | 0.00394179  | 6  |



|    |    |             |             |    |
|----|----|-------------|-------------|----|
| 49 | 74 | 0.627421996 | 0.207106048 | 9  |
| 49 | 75 | 0.078964538 | 0.010695379 | 6  |
| 50 | 55 | 1.904574252 | 0.550069323 | 6  |
| 50 | 70 | 1.61092051  | 0.24921696  | 3  |
| 50 | 72 | 0.406145579 | 0.067781893 | 4  |
| 50 | 75 | 0.405733037 | 0.037060875 | 3  |
| 52 | 55 | 0.959682875 | 0.057691094 | 4  |
| 52 | 59 | 0.952593313 | 0.052766309 | 9  |
| 52 | 62 | 0.386281175 | 0.056065939 | 9  |
| 52 | 63 | 0.185717848 | 0.028227212 | 9  |
| 52 | 65 | 0.173858113 | 0.020512526 | 9  |
| 52 | 66 | 0.286258508 | 0.02100948  | 9  |
| 52 | 68 | 0.188083081 | 0.022174053 | 9  |
| 52 | 69 | 0.254831256 | 0.045275474 | 9  |
| 52 | 70 | 0.542846157 | 0.049891183 | 6  |
| 52 | 71 | 0.701313857 | 0.046622643 | 6  |
| 52 | 72 | 0.199482742 | 0.020400603 | 6  |
| 52 | 73 | 0.074169409 | 0.002461158 | 9  |
| 52 | 74 | 0.510566048 | 0.098741056 | 6  |
| 52 | 75 | 0.060323992 | 0.003787749 | 9  |
| 53 | 55 | 1.475213482 | 0.184987557 | 15 |
| 53 | 56 | 0.462450237 | 0.018589183 | 9  |
| 53 | 57 | 0.324516596 | 0.016789629 | 9  |
| 53 | 58 | 0.801974758 | 0.077002329 | 9  |
| 53 | 59 | 6.867219917 | 0           | 2  |
| 53 | 60 | 0.48948569  | 0.032489996 | 9  |
| 53 | 61 | 0.275104022 | 0.013742084 | 9  |
| 53 | 62 | 0.530559654 | 0.061777454 | 9  |
| 53 | 63 | 0.314460395 | 0.044970921 | 9  |
| 53 | 65 | 0.293899784 | 0.03733071  | 9  |
| 53 | 66 | 0.576162638 | 0.071223018 | 9  |
| 53 | 68 | 0.381521723 | 0.019776246 | 9  |
| 53 | 69 | 0.687046498 | 0.071507051 | 9  |
| 53 | 70 | 3.148404635 | 0.445046411 | 4  |
| 53 | 71 | 1.059490579 | 0.00514746  | 4  |
| 53 | 74 | 1.286434855 | 0.362807334 | 4  |
| 53 | 75 | 0.185486772 | 0.036464238 | 9  |
| 55 | 56 | 0.835618545 | 0.029746196 | 6  |
| 55 | 57 | 0.758977336 | 0.031253123 | 9  |
| 55 | 58 | 1.123382221 | 0.023321781 | 9  |
| 55 | 60 | 1.188566608 | 0.068796143 | 9  |
| 55 | 61 | 0.974069677 | 0.152800573 | 6  |
| 55 | 62 | 0.094915967 | 0.006353615 | 4  |
| 55 | 63 | 0.434245785 | 0.080687084 | 9  |
| 55 | 65 | 0.260724666 | 0.022366712 | 9  |
| 55 | 66 | 0.191310018 | 0.011295335 | 18 |
| 55 | 69 | 0.516429161 | 0.069456704 | 4  |
| 55 | 72 | 0.579630016 | 0.066908236 | 9  |
| 55 | 73 | 0.167080758 | 0.007722549 | 9  |
| 55 | 74 | 0.911963646 | 0.12091639  | 12 |
| 55 | 75 | 0.102678776 | 0.016379822 | 9  |
| 56 | 58 | 0.421901272 | 0.015529482 | 6  |
| 56 | 64 | 0.127106295 | 0.017473475 | 9  |
| 56 | 65 | 0.180510122 | 0.006150878 | 9  |

|    |    |             |             |    |
|----|----|-------------|-------------|----|
| 56 | 66 | 0.469892692 | 0           | 2  |
| 56 | 68 | 0.328206086 | 0.025370037 | 6  |
| 56 | 70 | 2.054238785 | 0.111944294 | 6  |
| 56 | 71 | 1.036084326 | 0.010474908 | 3  |
| 56 | 72 | 0.230163434 | 0.012212589 | 9  |
| 56 | 74 | 0.350877078 | 0.013404548 | 6  |
| 56 | 75 | 0.115109    | 0.011625048 | 9  |
| 57 | 58 | 1.240436168 | 0.114078843 | 9  |
| 57 | 59 | 1.912773452 | 0.165833755 | 9  |
| 57 | 63 | 0.123069266 | 0.00197624  | 9  |
| 57 | 66 | 0.331914697 | 0.056400334 | 4  |
| 57 | 67 | 0.238334062 | 0.020911442 | 9  |
| 57 | 70 | 0.966622744 | 0.101470814 | 9  |
| 57 | 71 | 0.884073061 | 0.028035176 | 6  |
| 57 | 74 | 0.29575195  | 0.036967955 | 9  |
| 57 | 75 | 0.147330715 | 0.008832945 | 9  |
| 58 | 59 | 7.470070486 | 0.388966052 | 6  |
| 58 | 60 | 2.239951039 | 0.29983072  | 6  |
| 58 | 61 | 1.422630323 | 0.157419547 | 9  |
| 58 | 63 | 1.194252017 | 0.061259644 | 9  |
| 58 | 65 | 0.965311166 | 0.094803244 | 9  |
| 58 | 66 | 0.68339902  | 0.071197457 | 7  |
| 58 | 68 | 2.23666321  | 0.211098824 | 6  |
| 58 | 70 | 1.888123119 | 0.187322144 | 12 |
| 58 | 71 | 1.062625061 | 0.129982958 | 15 |
| 58 | 72 | 0.902987282 | 0.129108592 | 6  |
| 58 | 74 | 1.846667026 | 0.064143512 | 6  |
| 58 | 75 | 0.156223911 | 0.014240473 | 6  |
| 59 | 60 | 3.09583237  | 0.225878784 | 3  |
| 59 | 61 | 2.000950874 | 0.181147238 | 9  |
| 59 | 62 | 2.218612556 | 0.49593837  | 6  |
| 59 | 63 | 1.367234629 | 0.279898324 | 6  |
| 59 | 65 | 1.214196099 | 0.106191066 | 9  |
| 59 | 66 | 1.52976173  | 0.296672824 | 6  |
| 59 | 67 | 1.045356925 | 0.029197356 | 3  |
| 59 | 68 | 1.347087495 | 0.107429372 | 6  |
| 59 | 69 | 1.519671773 | 0.194499789 | 9  |
| 59 | 70 | 3.640702125 | 0.620242616 | 15 |
| 59 | 71 | 2.086773037 | 0.338537485 | 25 |
| 59 | 72 | 1.165046812 | 0.059463823 | 15 |
| 59 | 73 | 0.577132574 | 0.085758769 | 6  |
| 59 | 74 | 1.086394712 | 0.1360811   | 6  |
| 59 | 75 | 0.135618877 | 0.009530517 | 9  |
| 60 | 66 | 0.952014009 | 0.22973856  | 4  |
| 60 | 70 | 2.480315046 | 0.208854125 | 9  |
| 60 | 71 | 1.022865662 | 0.080093272 | 9  |
| 60 | 72 | 0.72232455  | 0.01715041  | 4  |
| 60 | 75 | 0.146827988 | 0.015146688 | 9  |
| 61 | 66 | 0.579804438 | 0.012056311 | 9  |
| 61 | 70 | 0.704604834 | 0.05521611  | 9  |
| 61 | 71 | 1.045634076 | 0.089705527 | 6  |
| 61 | 74 | 0.665366563 | 0.041924281 | 9  |
| 61 | 75 | 0.141592031 | 0.01690941  | 9  |
| 62 | 64 | 2.19560908  | 0.292930963 | 9  |

|    |    |             |             |    |
|----|----|-------------|-------------|----|
| 62 | 70 | 1.601745691 | 0.373953316 | 15 |
| 62 | 74 | 1.569631145 | 0.035175264 | 4  |
| 62 | 75 | 0.169029109 | 0.009278236 | 6  |
| 63 | 64 | 1.288796314 | 0.028469302 | 9  |
| 63 | 65 | 0.315811274 | 0.024752779 | 9  |
| 63 | 66 | 0.534908219 | 0.019297918 | 3  |
| 63 | 68 | 0.588908936 | 0.043553329 | 9  |
| 63 | 70 | 0.517991853 | 0.02085252  | 6  |
| 63 | 71 | 0.67740104  | 0.07455875  | 9  |
| 63 | 72 | 0.085915129 | 0.004604819 | 9  |
| 63 | 74 | 6.990279655 | 0.473922797 | 3  |
| 63 | 75 | 0.070138247 | 0.005648225 | 9  |
| 64 | 65 | 1.193576171 | 0.111345188 | 6  |
| 64 | 67 | 0.719153983 | 0.044353967 | 6  |
| 64 | 69 | 2.308342069 | 0.246240573 | 9  |
| 64 | 70 | 2.522424142 | 0.291879552 | 12 |
| 64 | 71 | 0.744532846 | 0.080503997 | 6  |
| 64 | 72 | 0.439446672 | 0.059406541 | 6  |
| 64 | 73 | 0.17857748  | 0.042752877 | 6  |
| 64 | 74 | 1.270458789 | 0.176517982 | 9  |
| 64 | 75 | 0.154119561 | 0.011697246 | 9  |
| 65 | 66 | 1.541149859 | 0.063856912 | 6  |
| 65 | 67 | 1.102939568 | 0.079882185 | 9  |
| 65 | 68 | 0.619394316 | 0.032918068 | 9  |
| 65 | 70 | 1.706422269 | 0.127631611 | 9  |
| 65 | 71 | 1.586629944 | 0.135669219 | 4  |
| 65 | 72 | 0.684455975 | 0.088900608 | 9  |
| 65 | 74 | 2.203364067 | 0.659174542 | 6  |
| 65 | 75 | 0.110308373 | 0.009029518 | 9  |
| 66 | 67 | 0.920302304 | 0.052238651 | 4  |
| 66 | 68 | 1.372962863 | 0.167562412 | 4  |
| 66 | 69 | 1.164849639 | 0.05599233  | 6  |
| 66 | 70 | 1.600309738 | 0.296281076 | 12 |
| 66 | 71 | 1.113192975 | 0.158836011 | 3  |
| 66 | 72 | 1.181767406 | 0.28357446  | 4  |
| 66 | 73 | 0.385077032 | 0.071775013 | 4  |
| 66 | 74 | 0.729716506 | 0           | 2  |
| 66 | 75 | 0.096366065 | 0.009171836 | 6  |
| 67 | 68 | 1.08391302  | 0.156111305 | 6  |
| 67 | 70 | 3.660969574 | 0.564057933 | 6  |
| 67 | 72 | 0.598017569 | 0.061009522 | 6  |
| 67 | 75 | 0.312657573 | 0           | 2  |
| 68 | 69 | 1.880723925 | 0.243326191 | 3  |
| 68 | 70 | 3.770305648 | 0.052517774 | 6  |
| 68 | 71 | 1.192866823 | 0.173236044 | 9  |
| 68 | 73 | 0.48384426  | 0.034440483 | 9  |
| 68 | 74 | 0.404988739 | 0.03618024  | 9  |
| 68 | 75 | 0.376238293 | 0.017311961 | 9  |
| 69 | 70 | 15.9642219  | 0.440985702 | 6  |
| 69 | 71 | 4.3682899   | 0.715141929 | 9  |
| 69 | 72 | 3.617031549 | 0.564039191 | 4  |
| 69 | 74 | 0.418240899 | 0.070586747 | 4  |
| 69 | 75 | 0.118300876 | 0.01253451  | 4  |
| 70 | 71 | 3.106239585 | 0.254476284 | 10 |

|    |    |             |             |    |
|----|----|-------------|-------------|----|
| 70 | 72 | 3.531625189 | 0.232789071 | 12 |
| 70 | 74 | 5.058870968 | 0.141893273 | 4  |
| 70 | 75 | 0.351818062 | 0.060137387 | 6  |
| 70 | 77 | 0.628249026 | 0.089632458 | 6  |
| 70 | 78 | 0.442087511 | 0.018664457 | 6  |
| 70 | 80 | 1.222205562 | 0.027062245 | 4  |
| 70 | 81 | 0.391067133 | 0.011822535 | 9  |
| 70 | 85 | 0.221159591 | 0.048806578 | 4  |
| 70 | 86 | 0.204743692 | 0.007870742 | 6  |
| 70 | 87 | 0.438326336 | 0.044300378 | 6  |
| 70 | 94 | 0.232655308 | 0.030502144 | 3  |
| 70 | 96 | 0.14097326  | 0.020478443 | 9  |
| 71 | 72 | 1.258844762 | 0.068650731 | 9  |
| 71 | 73 | 0.621827872 | 0.08219513  | 4  |
| 71 | 74 | 1.62132894  | 0.294082432 | 5  |
| 71 | 75 | 0.384247789 | 0.064587627 | 9  |
| 71 | 77 | 0.596519467 | 0.147660798 | 6  |
| 71 | 78 | 0.604571909 | 0.084870718 | 9  |
| 71 | 80 | 0.826866092 | 0           | 2  |
| 71 | 81 | 0.498398992 | 0.069430069 | 9  |
| 71 | 83 | 0.520725985 | 0.081353255 | 9  |
| 71 | 84 | 0.334881248 | 0.033975899 | 9  |
| 72 | 73 | 1.295031084 | 0.103251838 | 4  |
| 72 | 74 | 6.194947137 | 1.659041652 | 9  |
| 72 | 75 | 0.928503399 | 0           | 2  |
| 72 | 77 | 1.31470881  | 0.135124791 | 4  |
| 72 | 80 | 1.276715504 | 0           | 2  |
| 72 | 81 | 0.910922656 | 0.072353929 | 6  |
| 72 | 83 | 1.053094543 | 0.130426232 | 4  |
| 73 | 75 | 0.544874309 | 0.052651172 | 6  |

### 3. HoxC cluster (hChr. 12) BgIII 3C library

|    |    |             |             |    |
|----|----|-------------|-------------|----|
| 48 | 49 | 0.388667105 | 0.013619573 | 9  |
| 49 | 50 | 1.888432056 | 0.078807519 | 18 |
| 49 | 52 | 1.004400198 | 0.074311175 | 9  |
| 49 | 54 | 0.232012027 | 0.011668751 | 6  |
| 49 | 55 | 0.496446532 | 0.022643749 | 9  |
| 49 | 57 | 0.829543051 | 0.072400891 | 19 |
| 49 | 58 | 0.523949902 | 0.026590899 | 9  |
| 49 | 62 | 0.495275389 | 0.013783722 | 9  |
| 49 | 64 | 0.406755652 | 0.032142501 | 12 |
| 49 | 65 | 0.516639066 | 0.030890298 | 9  |
| 49 | 66 | 0.427399662 | 0.027371599 | 9  |
| 49 | 67 | 0.270652833 | 0.02105288  | 21 |
| 49 | 68 | 0.442630643 | 0.007240932 | 9  |
| 49 | 70 | 0.244059329 | 0.014045823 | 9  |
| 49 | 71 | 0.787696921 | 0.041999648 | 9  |
| 49 | 72 | 0.166245452 | 0.018282054 | 9  |
| 49 | 73 | 0.357896776 | 0.037227155 | 6  |
| 49 | 74 | 0.205313386 | 0.004269685 | 9  |
| 49 | 75 | 0.209199369 | 0.028195736 | 9  |
| 49 | 76 | 0.293611441 | 0.027382137 | 9  |
| 49 | 77 | 0.303694709 | 0.020410898 | 6  |
| 49 | 78 | 0.229586219 | 0.027365067 | 9  |

|    |    |             |             |    |
|----|----|-------------|-------------|----|
| 49 | 79 | 0.296509314 | 0.015473162 | 24 |
| 49 | 80 | 0.13810626  | 0.034210313 | 6  |
| 49 | 81 | 0.144833203 | 0.022020443 | 9  |
| 49 | 82 | 0.096282502 | 0.011584219 | 6  |
| 49 | 83 | 0.1080673   | 0.004326067 | 9  |
| 49 | 84 | 0.130854458 | 0.007623735 | 9  |
| 55 | 56 | 2.419725737 | 0.072335843 | 3  |
| 55 | 57 | 0.617504178 | 0.039379306 | 18 |
| 55 | 58 | 0.565667894 | 0.013980478 | 9  |
| 55 | 59 | 0.433246746 | 0.012818986 | 6  |
| 55 | 62 | 0.311660394 | 0.042379939 | 9  |
| 55 | 63 | 0.288844147 | 0.020928558 | 9  |
| 55 | 64 | 0.254569374 | 0.054851075 | 6  |
| 55 | 65 | 0.516502153 | 0.026529922 | 9  |
| 55 | 66 | 0.269332636 | 0.022415176 | 9  |
| 55 | 67 | 0.372193885 | 0.046611    | 18 |
| 55 | 68 | 0.180570864 | 0.020518776 | 9  |
| 55 | 70 | 0.175221875 | 0.002631237 | 6  |
| 55 | 71 | 0.120997564 | 0.010431374 | 6  |
| 55 | 72 | 0.206667982 | 0.012321795 | 6  |
| 55 | 73 | 0.29034873  | 0.030330004 | 3  |
| 55 | 74 | 0.12593622  | 0.018160733 | 9  |
| 55 | 75 | 0.191668005 | 0.014775253 | 9  |
| 55 | 76 | 0.311665256 | 0.024703054 | 15 |
| 55 | 77 | 0.179249993 | 0.004467855 | 6  |
| 55 | 78 | 0.227774112 | 0.040306081 | 6  |
| 55 | 79 | 0.18224212  | 0.011673007 | 9  |
| 55 | 80 | 0.231795176 | 0.021164556 | 9  |
| 55 | 81 | 0.06843926  | 0.005317264 | 4  |
| 55 | 82 | 0.120361758 | 0           | 2  |
| 55 | 83 | 0.176000195 | 0.030315289 | 4  |
| 55 | 84 | 0.185695935 | 0.010210208 | 4  |
| 56 | 79 | 0.726365944 | 0.0755813   | 9  |
| 57 | 58 | 0.936429644 | 0.022660143 | 9  |
| 57 | 59 | 2.797492073 | 0.364326466 | 6  |
| 57 | 62 | 1.451356386 | 0.327177554 | 6  |
| 57 | 63 | 0.99249847  | 0.197231637 | 9  |
| 57 | 64 | 0.391098194 | 0.019613121 | 4  |
| 57 | 65 | 0.857999764 | 0.127874126 | 9  |
| 57 | 66 | 1.091222519 | 0.231266106 | 6  |
| 57 | 67 | 1.065802302 | 0.128192863 | 37 |
| 57 | 68 | 0.319528044 | 0.07384598  | 9  |
| 57 | 70 | 0.373561386 | 0.072741297 | 9  |
| 57 | 71 | 0.516198912 | 0.051897544 | 6  |
| 57 | 73 | 1.007562134 | 0.099603313 | 6  |
| 57 | 74 | 0.223228145 | 0.037333111 | 6  |
| 57 | 75 | 0.770999096 | 0.195822474 | 6  |
| 57 | 76 | 0.482420042 | 0.032142877 | 9  |
| 57 | 77 | 0.275379577 | 0.066711582 | 9  |
| 57 | 78 | 0.247802346 | 0.056750831 | 9  |
| 57 | 79 | 0.230962451 | 0.03334609  | 6  |
| 57 | 80 | 0.205285411 | 0.079084876 | 6  |
| 57 | 81 | 0.257975288 | 0.068459327 | 6  |
| 57 | 82 | 1.212765368 | 0           | 1  |

|    |    |             |             |    |
|----|----|-------------|-------------|----|
| 57 | 83 | 0.030866124 | 0.006355574 | 6  |
| 57 | 84 | 0.198992944 | 0.023072005 | 6  |
| 58 | 59 | 1.707984174 | 0.026930657 | 6  |
| 58 | 61 | 0.938913273 | 0.033332687 | 9  |
| 58 | 62 | 0.737150334 | 0.046671808 | 9  |
| 58 | 63 | 0.612577481 | 0.014497158 | 9  |
| 58 | 64 | 0.900594371 | 0.112347713 | 9  |
| 58 | 65 | 0.499854515 | 0.01625087  | 9  |
| 58 | 66 | 0.435363391 | 0.037434324 | 9  |
| 58 | 67 | 0.733688731 | 0.094595844 | 9  |
| 58 | 68 | 0.381369285 | 0.050166499 | 6  |
| 58 | 70 | 0.225430735 | 0.025118771 | 3  |
| 58 | 72 | 0.235326653 | 0.029310176 | 9  |
| 58 | 73 | 0.382152554 | 0.022148317 | 9  |
| 58 | 74 | 0.262267569 | 0.019826273 | 9  |
| 58 | 75 | 0.508979562 | 0.061093697 | 4  |
| 58 | 76 | 0.511852634 | 0.010732393 | 6  |
| 58 | 77 | 0.141754069 | 0.006462196 | 4  |
| 58 | 78 | 0.1576619   | 0.005363052 | 6  |
| 58 | 79 | 0.265084073 | 0.006565558 | 4  |
| 58 | 80 | 0.264357261 | 0.05016243  | 4  |
| 58 | 81 | 0.20105928  | 0.065891672 | 4  |
| 58 | 82 | 0.245947157 | 0.038463068 | 9  |
| 58 | 83 | 0.124502418 | 0.004252762 | 6  |
| 58 | 84 | 0.142826916 | 0.007546671 | 9  |
| 60 | 75 | 2.078374353 | 0           | 1  |
| 61 | 66 | 1.636225063 | 0.213301752 | 6  |
| 61 | 75 | 0.94608474  | 0           | 2  |
| 61 | 90 | 0.835439854 | 0.064148268 | 9  |
| 62 | 63 | 1.763984363 | 0.104221277 | 18 |
| 62 | 64 | 1.025762439 | 0.044070957 | 9  |
| 62 | 65 | 1.405873442 | 0.077668645 | 9  |
| 62 | 66 | 1.257840126 | 0.167680141 | 24 |
| 62 | 67 | 1.725824863 | 0.227278296 | 12 |
| 62 | 68 | 0.809226023 | 0.081970539 | 15 |
| 62 | 70 | 0.180733276 | 0.032002901 | 9  |
| 62 | 71 | 0.967653834 | 0           | 2  |
| 62 | 72 | 0.712618646 | 0.110702199 | 9  |
| 62 | 73 | 4.170538846 | 1.692906    | 4  |
| 62 | 74 | 0.804989642 | 0.084938814 | 9  |
| 62 | 76 | 0.216256167 | 0.030250245 | 9  |
| 62 | 77 | 1.152663761 | 0.040512993 | 3  |
| 62 | 78 | 0.260629116 | 0.008229392 | 9  |
| 62 | 79 | 0.7528756   | 0.046375039 | 6  |
| 62 | 80 | 1.203640624 | 0.158286757 | 4  |
| 62 | 81 | 1.06991716  | 0.08043382  | 9  |
| 62 | 82 | 1.286495777 | 0           | 2  |
| 62 | 83 | 0.091967185 | 0.005733246 | 6  |
| 62 | 84 | 0.410412848 | 0.025614247 | 6  |
| 62 | 90 | 0.364055581 | 0.024546035 | 15 |
| 63 | 64 | 1.997016301 | 0.100033074 | 6  |
| 63 | 65 | 0.699816674 | 0.009273898 | 9  |
| 63 | 66 | 1.187457416 | 0.095092628 | 18 |
| 63 | 67 | 1.523454745 | 0.140043969 | 30 |

|    |    |             |             |    |
|----|----|-------------|-------------|----|
| 63 | 68 | 0.432779492 | 0.035491766 | 21 |
| 63 | 70 | 0.341132877 | 0.040926614 | 9  |
| 63 | 71 | 1.56360756  | 0           | 2  |
| 63 | 72 | 0.445201925 | 0.039694543 | 9  |
| 63 | 73 | 0.280168382 | 0.036948379 | 9  |
| 63 | 74 | 0.265037215 | 0.043287806 | 6  |
| 63 | 75 | 1.257933706 | 0.096093808 | 6  |
| 63 | 76 | 0.301829603 | 0.030061409 | 9  |
| 63 | 77 | 0.335046326 | 0.045139492 | 9  |
| 63 | 78 | 0.183674238 | 0.01661576  | 6  |
| 63 | 79 | 0.559782654 | 0.040996467 | 9  |
| 63 | 80 | 0.733298191 | 0.049052492 | 9  |
| 63 | 81 | 0.108815006 | 0.010864081 | 9  |
| 63 | 82 | 0.204906275 | 0.03305415  | 9  |
| 63 | 83 | 0.254315165 | 0.012703525 | 3  |
| 63 | 84 | 0.149016749 | 0.008279022 | 9  |
| 63 | 87 | 0.789461219 | 0           | 2  |
| 63 | 90 | 0.405733594 | 0.021313125 | 6  |
| 64 | 65 | 1.79668251  | 0.130177714 | 18 |
| 64 | 66 | 2.183977067 | 0.027145035 | 3  |
| 64 | 67 | 1.20375552  | 0.053469433 | 3  |
| 64 | 68 | 0.739737461 | 0.11103071  | 6  |
| 64 | 70 | 0.331758712 | 0.052573421 | 9  |
| 64 | 71 | 0.547709999 | 0.161393448 | 4  |
| 64 | 72 | 0.231203018 | 0.04102432  | 9  |
| 64 | 73 | 0.887879344 | 0.064557398 | 4  |
| 64 | 74 | 0.112032678 | 0.021054397 | 6  |
| 64 | 75 | 0.364354411 | 0.04530044  | 9  |
| 64 | 76 | 0.543372467 | 0.052172525 | 6  |
| 64 | 77 | 0.235679097 | 0.041243997 | 15 |
| 64 | 78 | 0.175500504 | 0.014525968 | 9  |
| 64 | 79 | 0.291731951 | 0.028621055 | 4  |
| 64 | 80 | 0.164287335 | 0.032510381 | 6  |
| 64 | 81 | 0.179620647 | 0.012538933 | 6  |
| 64 | 82 | 0.245251231 | 0.072669195 | 3  |
| 64 | 83 | 0.205723497 | 0.037490041 | 6  |
| 64 | 84 | 0.140560082 | 0.028022898 | 4  |
| 65 | 66 | 0.69337832  | 0.049552054 | 36 |
| 65 | 67 | 0.524636336 | 0.058349002 | 6  |
| 65 | 68 | 0.418331586 | 0.038861411 | 9  |
| 65 | 70 | 0.287937472 | 0.041208174 | 6  |
| 65 | 71 | 0.316849814 | 0.053330746 | 6  |
| 65 | 72 | 0.29874047  | 0.015706221 | 6  |
| 65 | 73 | 0.307499207 | 0.057999322 | 9  |
| 65 | 74 | 0.160068931 | 0.011870576 | 9  |
| 65 | 75 | 0.590501211 | 0           | 2  |
| 65 | 76 | 0.350120908 | 0.016265861 | 9  |
| 65 | 77 | 0.2272442   | 0.017176143 | 9  |
| 65 | 78 | 0.225555903 | 0.022314102 | 9  |
| 65 | 79 | 0.284764596 | 0.030230191 | 9  |
| 65 | 80 | 0.20133729  | 0.013105938 | 9  |
| 65 | 81 | 0.091926993 | 0.004483017 | 6  |
| 65 | 82 | 0.107124761 | 0.018803784 | 6  |
| 65 | 83 | 0.159654242 | 0.011380204 | 9  |

|    |    |             |             |    |
|----|----|-------------|-------------|----|
| 65 | 84 | 0.172445152 | 0.010015587 | 9  |
| 66 | 67 | 0.925546197 | 0.092144792 | 21 |
| 66 | 68 | 0.551143165 | 0.058485491 | 24 |
| 66 | 69 | 1.335902174 | 0.046973702 | 6  |
| 66 | 70 | 0.744234045 | 0.074605344 | 9  |
| 66 | 71 | 0.708571196 | 0.123625031 | 6  |
| 66 | 72 | 0.994188681 | 0.072198108 | 9  |
| 66 | 73 | 1.001753376 | 0.099693916 | 9  |
| 66 | 74 | 0.983744749 | 0.154686636 | 9  |
| 66 | 75 | 1.000042729 | 0.084605274 | 13 |
| 66 | 76 | 0.847867617 | 0.054811009 | 13 |
| 66 | 77 | 0.513871132 | 0.022061518 | 9  |
| 66 | 78 | 0.478655148 | 0.06588806  | 4  |
| 66 | 79 | 0.448521864 | 0.043408123 | 18 |
| 66 | 80 | 0.56762239  | 0.058215115 | 9  |
| 66 | 81 | 0.501036179 | 0.069251498 | 9  |
| 66 | 83 | 0.344478369 | 0.039161329 | 9  |
| 66 | 84 | 0.14178051  | 0.005240807 | 9  |
| 66 | 89 | 0.191829793 | 0.009728297 | 9  |
| 66 | 90 | 0.259080216 | 0.028539724 | 9  |
| 66 | 91 | 0.921969986 | 0.173523289 | 9  |
| 66 | 92 | 0.181884107 | 0.018840405 | 9  |
| 67 | 68 | 0.585493639 | 0.031376178 | 19 |
| 67 | 70 | 0.591328227 | 0.039827077 | 6  |
| 67 | 71 | 1.249741542 | 0.143495597 | 4  |
| 67 | 73 | 0.983705884 | 0.148240598 | 4  |
| 67 | 74 | 0.870002861 | 0.050352762 | 4  |
| 67 | 75 | 0.477187748 | 0.063007764 | 6  |
| 67 | 76 | 0.887994228 | 0.111893981 | 27 |
| 67 | 77 | 0.251226037 | 0.061523761 | 6  |
| 67 | 78 | 0.28444967  | 0.042396489 | 9  |
| 67 | 79 | 0.448655584 | 0.06938404  | 6  |
| 67 | 80 | 0.612382432 | 0.110550817 | 9  |
| 67 | 81 | 1.402282954 | 0           | 2  |
| 67 | 83 | 0.122527296 | 0.011017503 | 6  |
| 67 | 84 | 0.248385235 | 0.021725014 | 9  |
| 68 | 69 | 2.368098162 | 0.131502894 | 9  |
| 68 | 70 | 1.123067622 | 0.006705267 | 3  |
| 68 | 71 | 1.038487104 | 0           | 2  |
| 68 | 72 | 0.217338134 | 0.006231674 | 18 |
| 68 | 73 | 0.612826818 | 0.081947997 | 6  |
| 68 | 74 | 0.920195811 | 0.080962727 | 6  |
| 68 | 75 | 0.643078384 | 0.017835259 | 6  |
| 68 | 76 | 0.389025585 | 0.022716496 | 15 |
| 68 | 77 | 0.278491224 | 0.019353001 | 9  |
| 68 | 78 | 0.212805985 | 0.011562837 | 6  |
| 68 | 79 | 0.319967542 | 0.021661691 | 6  |
| 68 | 80 | 0.271122165 | 0.012529952 | 9  |
| 68 | 81 | 0.294577659 | 0.0321107   | 3  |
| 68 | 82 | 0.151609743 | 0.023407433 | 9  |
| 68 | 83 | 0.166171846 | 0.006416444 | 6  |
| 68 | 84 | 0.185838106 | 0.01460667  | 9  |
| 68 | 86 | 0.159688807 | 0.002346058 | 6  |
| 68 | 87 | 0.205773337 | 0.021548647 | 6  |



|    |    |             |             |    |
|----|----|-------------|-------------|----|
| 68 | 89 | 0.109844352 | 0.006361887 | 9  |
| 68 | 90 | 0.119649697 | 0.008981673 | 9  |
| 68 | 91 | 0.297127396 | 0.007940254 | 6  |
| 68 | 92 | 0.130152049 | 0.014723878 | 9  |
| 70 | 71 | 1.131664137 | 0.127428393 | 9  |
| 70 | 72 | 0.612073504 | 0.076079041 | 6  |
| 70 | 73 | 0.564374787 | 0.066934735 | 9  |
| 70 | 74 | 0.282778473 | 0.033562803 | 9  |
| 70 | 75 | 1.086236214 | 0.138226778 | 4  |
| 70 | 76 | 0.431940528 | 0.068486466 | 11 |
| 70 | 77 | 0.4969336   | 0.029893427 | 9  |
| 70 | 78 | 0.293241738 | 0.033690087 | 9  |
| 70 | 79 | 0.299825173 | 0.029009315 | 9  |
| 70 | 80 | 0.232902776 | 0.055860725 | 9  |
| 70 | 81 | 0.281137273 | 0.049396355 | 9  |
| 70 | 82 | 0.134536457 | 0           | 2  |
| 70 | 83 | 0.204561448 | 0.005842197 | 4  |
| 70 | 84 | 0.108672124 | 0.014479559 | 9  |
| 70 | 86 | 0.19563312  | 0.016829207 | 6  |
| 70 | 87 | 0.007768552 | 8.35619E-05 | 3  |
| 70 | 89 | 0.101487757 | 0.0118314   | 6  |
| 70 | 90 | 0.137445465 | 0.003283993 | 4  |
| 70 | 91 | 0.210184543 | 0.035433184 | 4  |
| 71 | 72 | 3.965240879 | 0.492288706 | 15 |
| 71 | 73 | 2.143861343 | 0.067893446 | 6  |
| 71 | 74 | 1.00965613  | 0.093850856 | 3  |
| 71 | 75 | 1.128521773 | 0.045108846 | 9  |
| 71 | 76 | 1.665046293 | 0.113186599 | 4  |
| 71 | 77 | 0.769857344 | 0.057350004 | 3  |
| 71 | 78 | 0.760944623 | 0.069418532 | 4  |
| 71 | 79 | 0.81222131  | 0.089047423 | 24 |
| 71 | 80 | 0.525429047 | 0.071919601 | 6  |
| 71 | 81 | 0.601811988 | 0.078794022 | 4  |
| 71 | 83 | 0.126335866 | 0.013061096 | 6  |
| 71 | 84 | 0.272469643 | 0.035282517 | 9  |
| 71 | 87 | 0.118877546 | 0.0262969   | 6  |
| 71 | 89 | 0.155016354 | 0           | 2  |
| 72 | 73 | 1.670605018 | 0.121402018 | 9  |
| 72 | 74 | 1.190170524 | 0.049751404 | 9  |
| 72 | 75 | 1.056641488 | 0.052421437 | 6  |
| 72 | 76 | 0.832208061 | 0.057280163 | 6  |
| 72 | 77 | 0.74688533  | 0.06581514  | 9  |
| 72 | 78 | 0.33622032  | 0.020774589 | 6  |
| 72 | 79 | 0.398928225 | 0.041493864 | 6  |
| 72 | 80 | 0.283674974 | 0.030260126 | 6  |
| 72 | 81 | 0.242215395 | 0.015169981 | 6  |
| 72 | 82 | 0.739668671 | 0.118649385 | 18 |
| 72 | 83 | 0.204349011 | 0.021316249 | 9  |
| 72 | 84 | 0.235343601 | 0.012846922 | 9  |
| 72 | 86 | 0.054141827 | 0.018485338 | 6  |
| 72 | 87 | 0.137472102 | 0.018939176 | 9  |
| 72 | 89 | 0.191604287 | 0.010467974 | 6  |
| 72 | 90 | 0.102483461 | 0.018409276 | 9  |
| 73 | 74 | 2.101760998 | 0.278376543 | 9  |

|    |    |             |             |    |
|----|----|-------------|-------------|----|
| 73 | 75 | 1.710752783 | 0.132973588 | 4  |
| 73 | 76 | 0.866249049 | 0.116986499 | 9  |
| 73 | 78 | 0.124829992 | 0.018539809 | 6  |
| 73 | 79 | 0.470798828 | 0.058103399 | 9  |
| 73 | 80 | 0.487211459 | 0.057779695 | 9  |
| 73 | 81 | 0.099335974 | 0           | 2  |
| 73 | 82 | 0.214921728 | 0.031348322 | 3  |
| 73 | 83 | 0.241554082 | 0.046324093 | 9  |
| 73 | 84 | 0.115742977 | 0.026658665 | 9  |
| 73 | 86 | 0.108493349 | 0.014202169 | 9  |
| 73 | 87 | 0.08286908  | 0.010693956 | 15 |
| 73 | 89 | 0.125674589 | 0.013011874 | 6  |
| 73 | 91 | 0.052413044 | 0.013576963 | 6  |
| 74 | 75 | 1.171505596 | 0.026289456 | 9  |
| 74 | 76 | 0.717233666 | 0.014535659 | 15 |
| 74 | 77 | 0.443796471 | 0.032204348 | 9  |
| 74 | 78 | 0.560781272 | 0.0344206   | 9  |
| 74 | 79 | 0.328122046 | 0.015823049 | 15 |
| 74 | 80 | 0.37937868  | 0.030552147 | 6  |
| 74 | 81 | 0.292584961 | 0.059675017 | 4  |
| 74 | 83 | 0.242971604 | 0.019061682 | 6  |
| 74 | 84 | 0.128107376 | 0.007592584 | 9  |
| 74 | 86 | 0.075454436 | 0.012619237 | 9  |
| 74 | 87 | 0.099909941 | 0.013280324 | 9  |
| 74 | 89 | 0.082048655 | 0.002120137 | 6  |
| 74 | 90 | 0.289880522 | 0.015458489 | 6  |
| 75 | 76 | 0.769679867 | 0.01455191  | 18 |
| 75 | 77 | 0.64164004  | 0.022951278 | 18 |
| 75 | 78 | 0.409620169 | 0           | 1  |
| 75 | 79 | 0.570552438 | 0.032885556 | 6  |
| 75 | 80 | 0.710079524 | 0.037679661 | 3  |
| 75 | 81 | 1.00611093  | 0.068637607 | 9  |
| 75 | 82 | 1.180704534 | 0           | 2  |
| 75 | 83 | 0.205311929 | 0.008475231 | 6  |
| 75 | 84 | 0.602398085 | 0.1689048   | 6  |
| 75 | 87 | 0.68251501  | 0.122155927 | 9  |
| 75 | 89 | 0.414247447 | 0.029174311 | 6  |
| 75 | 90 | 0.576535122 | 0.041424351 | 9  |
| 75 | 92 | 0.339964195 | 0.02189774  | 9  |
| 76 | 77 | 1.125673097 | 0.033678655 | 4  |
| 76 | 78 | 0.729203782 | 0.022427494 | 9  |
| 76 | 79 | 0.71129059  | 0.016140349 | 18 |
| 76 | 80 | 0.589842566 | 0.076650891 | 9  |
| 76 | 81 | 0.317545546 | 0.027198037 | 15 |
| 76 | 82 | 1.154036945 | 0.070587303 | 6  |
| 76 | 83 | 0.679275573 | 0.014413245 | 9  |
| 76 | 84 | 0.221874922 | 0.009235736 | 9  |
| 77 | 78 | 1.234188689 | 0.076012169 | 15 |
| 77 | 79 | 0.587311119 | 0.021916842 | 9  |
| 77 | 80 | 0.632157569 | 0.029293726 | 9  |
| 77 | 81 | 0.520600086 | 0.019898371 | 6  |
| 77 | 82 | 0.237929775 | 0.012785089 | 4  |
| 77 | 83 | 0.325197191 | 0.024482329 | 11 |
| 77 | 84 | 0.299957539 | 0.009977604 | 9  |

|    |    |             |             |    |
|----|----|-------------|-------------|----|
| 77 | 86 | 0.131973052 | 0.01395041  | 10 |
| 77 | 87 | 0.154153826 | 0.037051049 | 6  |
| 77 | 89 | 0.129890318 | 0.010392682 | 9  |
| 77 | 90 | 0.137763023 | 0.018893159 | 9  |
| 77 | 91 | 0.251557473 | 0.029851517 | 9  |
| 77 | 92 | 0.125266401 | 0.00655573  | 4  |
| 78 | 79 | 0.967115415 | 0.031679242 | 18 |
| 78 | 80 | 0.686042333 | 0.041959981 | 9  |
| 78 | 81 | 0.322349979 | 0.045067697 | 9  |
| 78 | 82 | 0.519722154 | 0.079216064 | 10 |
| 78 | 83 | 0.261408675 | 0.026279971 | 9  |
| 78 | 84 | 0.31441517  | 0.01808045  | 9  |
| 78 | 86 | 0.128110499 | 0.002545731 | 6  |
| 78 | 87 | 0.250169233 | 0.029701611 | 9  |
| 78 | 89 | 0.147676347 | 0.017872408 | 9  |
| 78 | 90 | 0.25040069  | 0.024052124 | 8  |
| 78 | 91 | 0.151909079 | 0.016157225 | 6  |
| 78 | 92 | 0.088338254 | 0.009072846 | 6  |
| 79 | 80 | 1.669484124 | 0.09084514  | 9  |
| 79 | 81 | 0.972259461 | 0.100584846 | 9  |
| 79 | 82 | 1.29842738  | 0.107301859 | 15 |
| 79 | 83 | 0.589442418 | 0.012557876 | 9  |
| 79 | 84 | 0.390526781 | 0.030858915 | 9  |
| 79 | 87 | 0.329584374 | 0.043774289 | 6  |
| 79 | 91 | 0.384376037 | 0.043649576 | 6  |
| 80 | 81 | 1.247024372 | 0.038545845 | 9  |
| 80 | 82 | 2.607089654 | 0.319596584 | 9  |
| 80 | 83 | 0.548280583 | 0.0281921   | 9  |
| 80 | 84 | 0.40296962  | 0.022982289 | 18 |
| 80 | 86 | 0.139876355 | 0.008099089 | 6  |
| 80 | 87 | 0.264390573 | 0.017944395 | 9  |
| 80 | 89 | 0.313281962 | 0.055713667 | 9  |
| 80 | 90 | 0.1740151   | 0.023270953 | 9  |
| 80 | 91 | 0.197052729 | 0.023350184 | 9  |
| 81 | 82 | 2.956722224 | 0.513201965 | 4  |
| 81 | 84 | 0.346403819 | 0.021531503 | 9  |
| 81 | 90 | 0.693144378 | 0.014702882 | 6  |
| 82 | 83 | 1.019438958 | 0.031367892 | 6  |
| 82 | 84 | 0.575061177 | 0.01129176  | 6  |
| 82 | 87 | 0.691378974 | 0.052936023 | 6  |
| 82 | 89 | 0.528755283 | 0.050870638 | 9  |
| 82 | 90 | 0.516466995 | 0.016122077 | 9  |
| 82 | 91 | 0.687192795 | 0.10687253  | 8  |
| 82 | 92 | 0.458807956 | 0           | 1  |
| 83 | 84 | 0.373175996 | 0.035228458 | 9  |
| 83 | 90 | 0.420026074 | 0.008853916 | 6  |
| 84 | 86 | 0.718856611 | 0.01917806  | 9  |
| 84 | 87 | 0.560083359 | 0.019539507 | 9  |
| 84 | 89 | 0.224861254 | 0.038801079 | 9  |
| 84 | 90 | 0.184813063 | 0.005473869 | 9  |
| 84 | 91 | 0.293998297 | 0.018407982 | 9  |
| 84 | 92 | 0.263569474 | 0.018383042 | 9  |

#### 4. HoxD cluster (hChr. 2) BgIII 3C library

|    |    |             |             |    |
|----|----|-------------|-------------|----|
| 47 | 63 | 0.01157912  | 0.000625791 | 6  |
| 48 | 63 | 0.036420086 | 0.007589193 | 9  |
| 49 | 62 | 0.02470507  | 0.003889242 | 9  |
| 49 | 63 | 0.022360558 | 0.005694188 | 9  |
| 49 | 69 | 0.002443007 | 7.66836E-05 | 6  |
| 50 | 63 | 0.024759587 | 0.002044597 | 9  |
| 50 | 69 | 0.11959954  | 0.00500194  | 3  |
| 50 | 75 | 0.032958102 | 0.005802507 | 6  |
| 51 | 54 | 0.223622117 | 0.025152983 | 9  |
| 51 | 62 | 0.051938182 | 0.012810664 | 9  |
| 51 | 63 | 0.05649947  | 0.014307655 | 9  |
| 51 | 69 | 0.053330597 | 0.012933753 | 9  |
| 51 | 75 | 0.019595687 | 0.001483559 | 3  |
| 52 | 54 | 0.530468194 | 0.015252301 | 9  |
| 52 | 60 | 0.004903139 | 0.000330631 | 6  |
| 52 | 61 | 0.135774151 | 0.013995596 | 9  |
| 52 | 63 | 0.143996001 | 0.011467827 | 15 |
| 52 | 65 | 0.047191517 | 0.002094412 | 6  |
| 52 | 66 | 0.105846283 | 0.002623477 | 4  |
| 52 | 69 | 0.207251461 | 0.052934188 | 15 |
| 52 | 70 | 0.153424989 | 0.036611197 | 9  |
| 52 | 72 | 0.112384012 | 0.032427483 | 6  |
| 52 | 74 | 0.139912823 | 0.020875929 | 9  |
| 52 | 75 | 0.035247606 | 0.007975779 | 9  |
| 52 | 77 | 0.022987089 | 0.005805597 | 6  |
| 52 | 78 | 0.114092967 | 0.026216519 | 9  |
| 52 | 79 | 0.034627678 | 0.001190239 | 4  |
| 52 | 80 | 0.033592397 | 0.003527728 | 6  |
| 53 | 54 | 1.170315292 | 0.073758679 | 9  |
| 53 | 62 | 0.199408377 | 0.025029868 | 9  |
| 53 | 63 | 0.093963486 | 0.013243443 | 9  |
| 53 | 68 | 0.475666988 | 0.038057096 | 9  |
| 53 | 69 | 0.262575292 | 0.039099967 | 18 |
| 53 | 70 | 0.400568778 | 0.061494953 | 9  |
| 53 | 72 | 0.104405302 | 0.007043762 | 9  |
| 53 | 73 | 0.206954189 | 0.034054805 | 9  |
| 53 | 74 | 0.077890583 | 0.011693533 | 6  |
| 53 | 75 | 0.142869809 | 0.027806127 | 9  |
| 53 | 78 | 0.06615926  | 0.0176479   | 9  |
| 54 | 56 | 5.389183236 | 0.675675969 | 9  |
| 54 | 59 | 0.522715167 | 0.164864037 | 6  |
| 54 | 60 | 0.488025747 | 0.061645126 | 9  |
| 54 | 61 | 0.13790567  | 0.015506727 | 6  |
| 54 | 62 | 0.207455878 | 0.009286868 | 12 |
| 54 | 63 | 0.100357992 | 0.010609776 | 18 |
| 54 | 65 | 0.033816141 | 0.00684642  | 9  |
| 54 | 66 | 0.084140865 | 0.019587115 | 6  |
| 54 | 68 | 0.097553439 | 0.013833663 | 9  |
| 54 | 69 | 0.108819236 | 0.023091486 | 15 |
| 54 | 70 | 0.028905269 | 0.002098777 | 6  |
| 54 | 72 | 0.04765301  | 0.004706307 | 9  |
| 54 | 73 | 0.811719002 | 0.031463538 | 9  |
| 54 | 74 | 1.465004622 | 0.066790857 | 6  |
| 54 | 75 | 0.367592222 | 0.078303312 | 18 |

|    |    |             |             |    |
|----|----|-------------|-------------|----|
| 54 | 76 | 0.913886641 | 0.10110693  | 9  |
| 54 | 77 | 0.317321345 | 0.045326841 | 6  |
| 54 | 78 | 0.10859094  | 0.025782235 | 12 |
| 54 | 79 | 0.162692935 | 0.057039394 | 6  |
| 54 | 80 | 0.887696884 | 0.282631386 | 9  |
| 56 | 62 | 0.130578703 | 0.023455847 | 9  |
| 56 | 63 | 0.087730284 | 0.013453417 | 6  |
| 56 | 69 | 0.10865671  | 0.013662135 | 6  |
| 56 | 72 | 0.038115242 | 0.014724587 | 4  |
| 56 | 75 | 0.123688426 | 0.006953948 | 9  |
| 56 | 78 | 0.195439324 | 0.017826918 | 6  |
| 57 | 63 | 0.337297118 | 0.135384589 | 6  |
| 57 | 75 | 0.100572369 | 0.007980904 | 6  |
| 59 | 62 | 0.237550257 | 0.055410448 | 9  |
| 59 | 63 | 0.164238729 | 0.013053584 | 9  |
| 59 | 69 | 0.067592684 | 0.025326201 | 6  |
| 59 | 72 | 0.068917076 | 0.011148167 | 6  |
| 59 | 73 | 0.317906371 | 0.101047436 | 9  |
| 59 | 75 | 0.231650556 | 0.014140864 | 9  |
| 59 | 76 | 0.086121122 | 0           | 2  |
| 59 | 78 | 0.090008951 | 0.024099921 | 9  |
| 60 | 62 | 0.915412751 | 0.053869801 | 9  |
| 60 | 63 | 0.269409626 | 0.048794231 | 9  |
| 60 | 69 | 0.379532245 | 0.124161666 | 9  |
| 60 | 76 | 0.289214099 | 0.048372218 | 9  |
| 61 | 62 | 0.775672653 | 0.046683513 | 9  |
| 61 | 63 | 0.396321795 | 0.03595493  | 9  |
| 61 | 65 | 0.034610468 | 0.001704929 | 6  |
| 61 | 66 | 0.601101588 | 0.157467741 | 9  |
| 61 | 68 | 0.159297162 | 0.012947724 | 9  |
| 61 | 69 | 0.264490385 | 0.066013491 | 9  |
| 61 | 70 | 0.282682574 | 0.062053884 | 9  |
| 61 | 72 | 0.140400435 | 0.015714979 | 9  |
| 61 | 73 | 0.127889243 | 0.016800283 | 6  |
| 61 | 75 | 0.108083937 | 0.016005051 | 18 |
| 61 | 76 | 0.161612731 | 0.012698438 | 9  |
| 61 | 77 | 0.020977737 | 0.005249364 | 3  |
| 61 | 78 | 0.188337324 | 0.029886651 | 9  |
| 62 | 63 | 0.763364833 | 0.032677569 | 27 |
| 62 | 65 | 0.158522254 | 0.030539806 | 9  |
| 62 | 66 | 0.410043686 | 0.018011885 | 6  |
| 62 | 68 | 0.461325071 | 0.012288181 | 18 |
| 62 | 69 | 1.138675419 | 0.07493686  | 27 |
| 62 | 70 | 0.557056622 | 0.077353303 | 15 |
| 62 | 72 | 0.35746854  | 0.025209582 | 9  |
| 62 | 73 | 0.163328326 | 0.021887652 | 9  |
| 62 | 74 | 0.299782797 | 0.016717918 | 9  |
| 62 | 75 | 0.319448289 | 0.011024206 | 24 |
| 62 | 76 | 0.522886361 | 0.048362055 | 18 |
| 62 | 77 | 0.167795789 | 0.012375174 | 6  |
| 62 | 78 | 0.159361281 | 0.022725774 | 9  |
| 62 | 79 | 0.146018436 | 0.006368698 | 6  |
| 62 | 80 | 0.306677635 | 0.064142326 | 6  |
| 63 | 64 | 4.61867188  | 0.301166852 | 9  |

|    |    |             |             |    |
|----|----|-------------|-------------|----|
| 63 | 65 | 0.223296719 | 0.050143293 | 18 |
| 63 | 68 | 0.270851848 | 0.012168193 | 9  |
| 63 | 69 | 0.393584053 | 0.037062605 | 9  |
| 63 | 70 | 0.332559782 | 0.038782036 | 15 |
| 63 | 71 | 0.039735869 | 0.009733017 | 9  |
| 63 | 72 | 0.083114165 | 0.022719667 | 9  |
| 63 | 73 | 0.177239408 | 0.011308681 | 9  |
| 63 | 74 | 0.092666658 | 0.025671591 | 9  |
| 63 | 75 | 0.171294173 | 0.009551223 | 24 |
| 63 | 76 | 0.16226801  | 0.022279826 | 18 |
| 63 | 77 | 0.043563069 | 0.006508188 | 6  |
| 63 | 78 | 0.104455745 | 0.005161622 | 9  |
| 63 | 79 | 0.130874082 | 0.014914311 | 9  |
| 64 | 70 | 0.160666969 | 0.052105431 | 9  |
| 65 | 69 | 0.468161833 | 0.03983373  | 9  |
| 65 | 70 | 0.136118799 | 0.024951876 | 6  |
| 65 | 72 | 0.124402625 | 0.0096685   | 9  |
| 65 | 73 | 0.246590413 | 0.045089128 | 6  |
| 65 | 75 | 0.075407636 | 0.006705602 | 18 |
| 65 | 77 | 2.830573248 | 0.840409434 | 3  |
| 65 | 78 | 0.043712632 | 0.011874276 | 6  |
| 66 | 69 | 2.913046705 | 0.514950985 | 9  |
| 66 | 73 | 0.394186427 | 0.127578804 | 9  |
| 66 | 76 | 0.257041697 | 0.081791508 | 9  |
| 66 | 77 | 0.928039324 | 0.255323159 | 6  |
| 66 | 78 | 0.02953769  | 0.003566499 | 9  |
| 68 | 69 | 3.349712634 | 0.353678055 | 9  |
| 68 | 70 | 2.21636748  | 0.172064591 | 9  |
| 68 | 72 | 0.599990462 | 0.013133965 | 9  |
| 68 | 73 | 0.664673876 | 0.054101214 | 9  |
| 68 | 74 | 0.419027406 | 0.065547279 | 9  |
| 68 | 75 | 0.502235807 | 0.037567769 | 15 |
| 68 | 76 | 1.212059803 | 0.138667747 | 9  |
| 68 | 77 | 0.403815363 | 0.050093153 | 9  |
| 68 | 78 | 0.257968011 | 0.019811918 | 18 |
| 68 | 79 | 0.137881911 | 0.016202529 | 9  |
| 69 | 70 | 18.97160533 | 0.411405698 | 9  |
| 69 | 72 | 2.596834627 | 0.058684512 | 6  |
| 69 | 75 | 1.093906978 | 0.014616301 | 6  |
| 69 | 78 | 0.337769285 | 0.023617012 | 9  |
| 69 | 79 | 0.412101152 | 0.044213859 | 9  |
| 70 | 71 | 8.120111488 | 0.209020837 | 6  |
| 70 | 72 | 3.066151806 | 0.080575907 | 9  |
| 70 | 73 | 1.942633407 | 0.205123116 | 9  |
| 70 | 74 | 0.730546923 | 0.096282863 | 9  |
| 70 | 75 | 0.766711155 | 0.072584043 | 15 |
| 70 | 76 | 0.592584819 | 0.064562624 | 9  |
| 70 | 77 | 0.52839102  | 0.047018707 | 18 |
| 70 | 78 | 0.319221812 | 0.047697385 | 15 |
| 70 | 79 | 0.135643654 | 0.005783741 | 6  |
| 70 | 80 | 0.067154844 | 0.013456031 | 6  |
| 72 | 75 | 0.454405202 | 0.027470812 | 9  |
| 72 | 76 | 0.625014475 | 0.053757367 | 9  |
| 72 | 77 | 0.36599296  | 0.030091523 | 9  |

|    |    |             |             |    |
|----|----|-------------|-------------|----|
| 72 | 78 | 0.132849165 | 0.010800555 | 9  |
| 72 | 79 | 0.201179705 | 0.003907295 | 4  |
| 73 | 75 | 0.064644621 | 0.013913054 | 6  |
| 73 | 76 | 0.406643422 | 0.017568999 | 9  |
| 73 | 77 | 0.310072833 | 0.016634351 | 9  |
| 73 | 78 | 0.129511771 | 0.020159794 | 6  |
| 73 | 79 | 0.45960647  | 0.085384935 | 9  |
| 74 | 75 | 2.015540169 | 0.139598041 | 9  |
| 74 | 76 | 1.828820812 | 0.253671272 | 9  |
| 74 | 77 | 0.34089806  | 0.057902551 | 9  |
| 74 | 78 | 0.180053165 | 0.011781978 | 9  |
| 74 | 79 | 0.100449378 | 0.009451037 | 9  |
| 75 | 76 | 2.584536658 | 0.06369268  | 9  |
| 75 | 77 | 1.473864701 | 0.071991158 | 18 |
| 75 | 78 | 0.567402686 | 0.034264357 | 9  |
| 75 | 79 | 0.524504465 | 0.130069063 | 9  |
| 76 | 77 | 5.848185921 | 0.389671752 | 9  |
| 76 | 78 | 0.815686393 | 0.074079406 | 9  |
| 76 | 79 | 0.518598307 | 0.021929117 | 9  |
| 76 | 80 | 0.281424387 | 0.032093122 | 6  |
| 77 | 78 | 0.846185808 | 0.108442432 | 9  |
| 77 | 79 | 2.93053088  | 0.252116579 | 6  |
| 78 | 79 | 3.235804    | 0.322903924 | 18 |
| 78 | 80 | 2.375043951 | 0.199113399 | 9  |
| 79 | 80 | 7.183029633 | 1.072657337 | 9  |

#### 5. HoxD cluster (hChr.2) HindIII 3C library

|    |    |             |             |    |
|----|----|-------------|-------------|----|
| 76 | 85 | 0.105334983 | 0.008584528 | 3  |
| 76 | 93 | 0.024097511 | 0.003365362 | 9  |
| 77 | 85 | 0.072835398 | 0.00349924  | 6  |
| 77 | 93 | 0.05770575  | 0.005762809 | 9  |
| 79 | 81 | 0.276306869 | 0.01631304  | 9  |
| 79 | 82 | 0.152039955 | 0.037501696 | 6  |
| 79 | 83 | 0.132427837 | 0.006551934 | 9  |
| 79 | 84 | 0.109351306 | 0.008227966 | 6  |
| 79 | 85 | 0.096185962 | 0.004209614 | 6  |
| 79 | 86 | 0.125831396 | 0.005743939 | 9  |
| 79 | 87 | 0.046538586 | 0.00411821  | 9  |
| 79 | 88 | 0.044296484 | 0.001713328 | 9  |
| 79 | 93 | 0.133518961 | 0.007904945 | 18 |
| 79 | 98 | 0.053003201 | 0.01217096  | 9  |
| 80 | 81 | 0.400251383 | 0.019872293 | 9  |
| 80 | 82 | 0.517995243 | 0.016997625 | 9  |
| 80 | 85 | 0.325022133 | 0.057497073 | 6  |
| 80 | 86 | 0.046993293 | 0.001172316 | 4  |
| 80 | 87 | 0.108480599 | 0.007884975 | 9  |
| 80 | 90 | 0.194913579 | 0.02266323  | 3  |
| 80 | 98 | 0.062444518 | 0.006825416 | 6  |
| 81 | 82 | 0.56524625  | 0.034305697 | 9  |
| 81 | 83 | 0.241887222 | 0.017989556 | 9  |
| 81 | 84 | 0.768128635 | 0.059136234 | 6  |
| 81 | 85 | 0.138311024 | 0.010548364 | 9  |
| 81 | 86 | 0.168473834 | 0.018510257 | 6  |
| 81 | 87 | 0.077624054 | 0.003411896 | 6  |

|    |     |             |             |    |
|----|-----|-------------|-------------|----|
| 81 | 88  | 0.122132514 | 0.007923806 | 9  |
| 81 | 90  | 0.128796541 | 0.024175612 | 9  |
| 81 | 93  | 0.173021977 | 0.013419977 | 15 |
| 81 | 98  | 0.063080142 | 0.003207557 | 6  |
| 82 | 83  | 0.59514323  | 0.011478081 | 6  |
| 82 | 84  | 0.396183593 | 0.04207913  | 9  |
| 82 | 85  | 0.273269133 | 0.042836593 | 6  |
| 82 | 86  | 0.274427155 | 0.026143462 | 6  |
| 82 | 87  | 0.131863578 | 0.011536482 | 6  |
| 82 | 88  | 0.136618426 | 0.013764537 | 9  |
| 82 | 90  | 0.059209253 | 0.000968246 | 6  |
| 82 | 93  | 0.313001755 | 0.026334663 | 18 |
| 82 | 94  | 0.168185542 | 0.006560169 | 9  |
| 82 | 98  | 0.135223457 | 0.020666663 | 6  |
| 83 | 84  | 1.611524056 | 0.076777458 | 6  |
| 83 | 85  | 0.470788226 | 0.0297113   | 9  |
| 83 | 86  | 0.56787186  | 0.047819238 | 6  |
| 83 | 87  | 0.408503799 | 0.048959181 | 9  |
| 83 | 88  | 0.188983498 | 0.008997461 | 9  |
| 83 | 90  | 0.372077125 | 0.035047766 | 9  |
| 83 | 91  | 0.133082761 | 0.002966725 | 9  |
| 83 | 92  | 0.261341285 | 0.003813395 | 9  |
| 83 | 93  | 0.403562428 | 0.025685121 | 9  |
| 83 | 94  | 0.215551547 | 0.008673574 | 9  |
| 83 | 95  | 0.113621674 | 0.008567332 | 9  |
| 83 | 96  | 0.059402626 | 0.003419267 | 9  |
| 83 | 97  | 0.147187991 | 0.00953425  | 6  |
| 83 | 98  | 0.301059899 | 0.030154787 | 9  |
| 83 | 99  | 0.209591211 | 0.005082283 | 6  |
| 83 | 100 | 0.113168984 | 0.004165872 | 6  |
| 83 | 101 | 0.153941063 | 0.005473137 | 6  |
| 83 | 103 | 0.103614797 | 0.006949853 | 9  |
| 84 | 85  | 3.356238212 | 0.1617265   | 9  |
| 84 | 86  | 0.259603499 | 0.046456087 | 6  |
| 84 | 87  | 1.28717193  | 0.191192111 | 6  |
| 84 | 88  | 0.605971277 | 0.093581684 | 9  |
| 84 | 90  | 0.783987391 | 0.171737882 | 6  |
| 84 | 91  | 0.200719958 | 0.010191694 | 6  |
| 84 | 92  | 0.57276385  | 0.073479364 | 4  |
| 84 | 93  | 0.722056185 | 0.037917843 | 9  |
| 84 | 94  | 0.284169748 | 0.072922016 | 6  |
| 84 | 95  | 0.248041086 | 0.031771886 | 6  |
| 84 | 96  | 0.141985577 | 0.022317253 | 9  |
| 84 | 97  | 0.257962232 | 0.018361582 | 3  |
| 84 | 98  | 0.718473857 | 0.053929206 | 9  |
| 84 | 99  | 0.249596024 | 0.027891935 | 9  |
| 84 | 100 | 0.199451524 | 0.000308947 | 4  |
| 84 | 101 | 0.185196548 | 0           | 2  |
| 85 | 86  | 1.354907989 | 0           | 2  |
| 85 | 87  | 0.733341394 | 0.130535462 | 9  |
| 85 | 88  | 0.371032483 | 0.042670186 | 9  |
| 85 | 89  | 0.561881136 | 0.069862568 | 6  |
| 85 | 90  | 0.442207126 | 0.049921567 | 6  |
| 85 | 91  | 0.271228735 | 0.019918783 | 6  |



|    |     |             |             |    |
|----|-----|-------------|-------------|----|
| 85 | 92  | 0.468232699 | 0.013463933 | 6  |
| 85 | 93  | 0.777078431 | 0.028492089 | 18 |
| 85 | 94  | 0.584528739 | 0.053195795 | 15 |
| 85 | 95  | 0.204276919 | 0.012526574 | 9  |
| 85 | 96  | 0.150784432 | 0.010899307 | 9  |
| 85 | 97  | 0.17044664  | 0.005558876 | 9  |
| 85 | 98  | 0.450902457 | 0.026876218 | 18 |
| 85 | 99  | 0.344945903 | 0.038801097 | 9  |
| 85 | 100 | 0.128133505 | 0.005268756 | 9  |
| 85 | 101 | 0.183701314 | 0.026121622 | 9  |
| 85 | 103 | 0.173575355 | 0.022993291 | 6  |
| 85 | 104 | 0.092458438 | 0.015215878 | 9  |
| 86 | 93  | 0.400291911 | 0.043890627 | 10 |
| 86 | 94  | 0.389451645 | 0.017481851 | 4  |
| 86 | 95  | 0.229045578 | 0.023313409 | 6  |
| 86 | 98  | 0.560698207 | 0.044260572 | 9  |
| 87 | 93  | 0.46680754  | 0.036118148 | 18 |
| 87 | 94  | 0.603934226 | 0.107919698 | 9  |
| 87 | 95  | 0.219149726 | 0.025886833 | 9  |
| 87 | 98  | 0.128563694 | 0.009961838 | 6  |
| 88 | 93  | 0.288988378 | 0.024006636 | 18 |
| 88 | 94  | 0.29356331  | 0.045825838 | 9  |
| 88 | 95  | 0.101732999 | 0.005220265 | 6  |
| 88 | 98  | 0.220297846 | 0.027511547 | 9  |
| 89 | 93  | 0.267033549 | 0.014825826 | 6  |
| 89 | 95  | 0.107348735 | 0.010812869 | 9  |
| 89 | 98  | 0.177684968 | 0.000502591 | 6  |
| 90 | 93  | 0.291274108 | 0.023958377 | 18 |
| 90 | 94  | 0.167671136 | 0.015868251 | 4  |
| 90 | 95  | 0.16577654  | 0.022700181 | 9  |
| 90 | 98  | 0.269002884 | 0.040985101 | 6  |
| 91 | 94  | 0.38836699  | 0.049016827 | 6  |
| 91 | 95  | 0.105793178 | 0.004179667 | 9  |
| 91 | 98  | 0.173240703 | 0.01757952  | 9  |
| 92 | 93  | 0.522550065 | 0.037946512 | 15 |
| 92 | 94  | 0.554093917 | 0.042146337 | 9  |
| 92 | 95  | 0.112806785 | 0.005525207 | 6  |
| 92 | 98  | 0.504146791 | 0.036339851 | 6  |
| 93 | 94  | 1.264904749 | 0.062106945 | 9  |
| 93 | 95  | 0.334837362 | 0.010808618 | 9  |
| 93 | 96  | 0.20343215  | 0.01332561  | 15 |
| 93 | 97  | 0.155308364 | 0.012031706 | 13 |
| 93 | 98  | 0.603735363 | 0.028669137 | 9  |
| 93 | 99  | 0.548977248 | 0.045838964 | 15 |
| 93 | 100 | 0.218071032 | 0.011373878 | 15 |
| 93 | 101 | 0.210236854 | 0.021439339 | 15 |
| 93 | 103 | 0.182269541 | 0.0059596   | 9  |
| 94 | 98  | 0.445567963 | 0.04935346  | 9  |
| 95 | 98  | 0.507750942 | 0.02657871  | 6  |
| 96 | 98  | 0.214433739 | 0.028157352 | 9  |
| 97 | 98  | 0.367981157 | 0.016854571 | 9  |
| 97 | 103 | 0.161854519 | 0.023030797 | 9  |
| 98 | 99  | 1.128734183 | 0.065987206 | 9  |
| 98 | 100 | 0.419369424 | 0.024472178 | 9  |

|     |     |             |             |   |
|-----|-----|-------------|-------------|---|
| 98  | 101 | 0.365926341 | 0.018271555 | 9 |
| 98  | 103 | 0.445790234 | 0.036662766 | 9 |
| 98  | 104 | 0.158467448 | 0.018144003 | 9 |
| 99  | 103 | 0.337341534 | 0.060250364 | 6 |
| 100 | 103 | 0.333712008 | 0.031226585 | 9 |
| 101 | 103 | 0.960069795 | 0.061624324 | 9 |

## Supplementary Table 4 CTCF binding sites spatial proximity pvalues

| CTCF binding site no. | CTCF binding site no. | spatial proximity pvalue |
|-----------------------|-----------------------|--------------------------|
|-----------------------|-----------------------|--------------------------|

### 1. HoxA cluster (hChr.7)

|   |   |            |
|---|---|------------|
| 1 | 2 | 0.02678203 |
| 1 | 3 | 0.31070582 |
| 1 | 4 | 0.13829335 |
| 1 | 5 | 0.15077596 |
| 1 | 6 | 0.0389216  |
| 1 | 7 | 0.07878337 |
| 2 | 3 | 0.36581353 |
| 2 | 4 | 0.24963315 |
| 2 | 5 | 0.20176091 |
| 2 | 6 | 0.08902356 |
| 2 | 7 | 0.04752285 |
| 3 | 4 | 0.23697267 |
| 3 | 5 | 0.33403211 |
| 3 | 6 | 0.00442767 |
| 3 | 7 | 0.00465001 |
| 4 | 5 | 0.19716172 |
| 4 | 6 | 0.0173232  |
| 4 | 7 | 0.028764   |
| 5 | 6 | 0.1122355  |
| 5 | 7 | 0.19742217 |
| 6 | 7 | 0.03869927 |

### 2. HoxB cluster (hChr.17)

|   |   |            |
|---|---|------------|
| 1 | 2 | 0.41633609 |
| 1 | 3 | 0.53089901 |
| 1 | 4 | 0.23939206 |
| 1 | 5 | 0.04427663 |
| 1 | 6 | 0.05616785 |
| 2 | 3 | 0.6740716  |
| 2 | 4 | 0.46478994 |
| 2 | 5 | 0.3613153  |
| 2 | 6 | 0.27453042 |
| 3 | 4 | 0.6005353  |
| 3 | 5 | 0.25438991 |
| 3 | 6 | 0.23983176 |
| 4 | 5 | 0.17808154 |

|   |   |            |
|---|---|------------|
| 4 | 6 | 0.26319362 |
| 5 | 6 | 0.03994647 |

### 3. HoxC cluster (hChr.12)

|   |   |            |
|---|---|------------|
| 1 | 2 | 0.18062496 |
| 1 | 3 | 0.18832248 |
| 1 | 4 | 0.08762587 |
| 1 | 5 | 0.07488327 |
| 1 | 6 | 0.26323993 |
| 1 | 7 | 0.17818445 |
| 1 | 8 | 0.0446196  |
| 2 | 3 | 0.24570518 |
| 2 | 4 | 0.19256089 |
| 2 | 5 | 0.01144373 |
| 2 | 6 | 0.2037175  |
| 2 | 7 | 0.11639926 |
| 2 | 8 | 0.04037435 |
| 3 | 4 | 0.46231568 |
| 3 | 5 | 0.01901819 |
| 3 | 6 | 0.21360259 |
| 3 | 7 | 0.13021513 |
| 3 | 8 | 0.05475762 |
| 4 | 5 | 0.18242971 |
| 4 | 6 | 0.24095405 |
| 4 | 7 | 0.16004813 |
| 4 | 8 | 0.17501248 |
| 5 | 6 | 0.31995269 |
| 5 | 7 | 0.22065067 |
| 5 | 8 | 0.07451412 |
| 6 | 7 | 0.07382367 |
| 6 | 8 | 0.4363793  |
| 7 | 8 | 0.44610715 |

### 4. HoxD cluster (hChr.2)

|   |   |            |
|---|---|------------|
| 1 | 2 | 0.16015709 |
| 1 | 3 | 0.14159152 |
| 1 | 4 | 0.02713644 |
| 1 | 5 | 0.10446039 |
| 1 | 6 | 0.05235583 |
| 1 | 7 | 0.04996417 |
| 2 | 3 | 0.36911509 |

|   |   |            |
|---|---|------------|
| 2 | 4 | 0.26814447 |
| 2 | 5 | 0.38422811 |
| 2 | 6 | 0.26165815 |
| 2 | 7 | 0.32729371 |
| 3 | 4 | 0.68014182 |
| 3 | 5 | 0.47995943 |
| 3 | 6 | 0.30230697 |
| 3 | 7 | 0.2585034  |
| 4 | 5 | 0.38293457 |
| 4 | 6 | 0.06399769 |
| 4 | 7 | 0.05015029 |
| 5 | 6 | 0.15009725 |
| 5 | 7 | 0.09429818 |
| 6 | 7 | 0.41942358 |
